# Supplementary material for: Inhibition of platelet-surface-bound proteins during coagulation under flow I: TFPI
Source: PubMed Central journal article supplement — Biophys J. 2022 Nov 21;122(1):99–113. doi: 10.1016/j.bpj.2022.11.023 (PMC9822800; doi:10.1016/j.bpj.2022.11.023), 2022-11-21
Supplement: mmc1.pdf [file mmc1.pdf]

**Biophysical Journal, Volume 122**

**Supplemental information**

**Inhibition of platelet-surface-bound proteins during coagulation under  
flow I: TFPI**

**Kenji Miyazawa, Aaron L. Fogelson, and Karin Leiderman**

**Article**

**Supplementary Information for: Inhibition of  
platelet-surface-bound proteins during coagulation under  
flow**

Kenji Miyazawa, Aaron L. Fogelson, Karin Leiderman

**S1 MODEL SCHEMATIC**

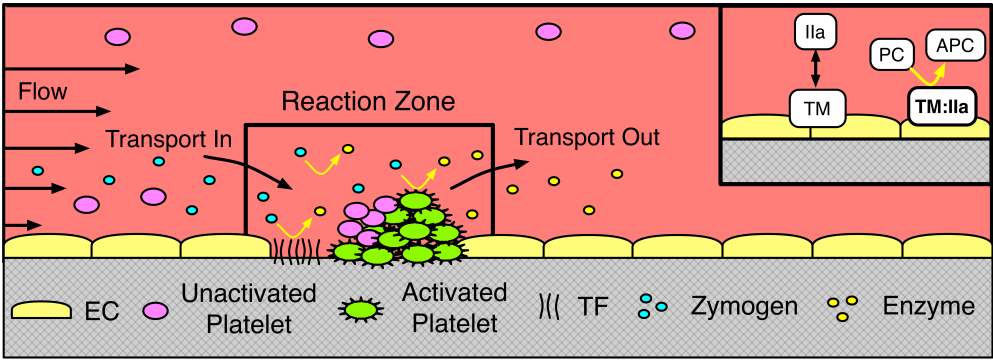

Figure S1: Schematic of the model reaction zone (main figure) and endothelial zone (inset).

## S2 MODEL EQUATIONS

Below we have listed the full model equations for all species. The model detailed here includes extensions of our previous work (1–3). In total, the model consists of 130 species (and their corresponding ordinary differential equations) and 239 parameters including kinetic rates and initial/upstream concentrations. The solution of the model equations was carried out with our in-house fortran code that uses DLSODE for the numerical solution of the differential equations; each run of the model that simulates 40 minutes of clotting activity takes less than 10 seconds on a linux-based laptop. Simulations of this model (in the absence of heparin) can be performed with our online coagulation simulator: [ClotSims](#). Below, blue text indicates the additional terms we added for the TFPI-mediated reactions, and purple text indicates the additional terms we added for the AT-mediated reactions. Strikeouts shows the terms we have removed from our previous version of the model.

$$\begin{aligned} \frac{d}{dt} z_7 = & -k_7^{on} z_7 [TF]^{avail} + k_7^{off} z_7^m \\ & -k_{z_7:e_2}^+ z_7 e_2 + k_{z_7:e_2}^- [Z_7 : E_2] \\ & -k_{z_7:e_{10}}^+ z_7 e_{10} + k_{z_7:e_{10}}^- [Z_7 : E_{10}] \\ & +k_{flow} (z_7^{up} - z_7) \\ & -k_{z_7:e_9}^+ z_7 e_9 + k_{z_7:e_9}^- [Z_7 : E_9] \end{aligned} \quad (1)$$

$$\begin{aligned} \frac{d}{dt} e_7 = & -k_7^{on} e_7 [TF]^{avail} + k_7^{off} e_7^m \\ & +k_{z_7:e_2}^{cat} [Z_7 : E_2] + k_{z_7:e_{10}}^{cat} [Z_7 : E_{10}] \\ & k_{flow} (e_7^{up} - e_7) + k_{z_7:e_9}^{cat} [Z_7 : E_9] \end{aligned} \quad (2)$$

$$\begin{aligned} \frac{d}{dt} z_{10} = & -k_{10}^{on} z_{10} p_{10}^{avail} + k_{10}^{off} z_{10}^m \\ & -k_{z_{10}:e_7^m}^+ z_{10} e_7^m + k_{z_{10}:e_7^m}^- [Z_{10} : E_7^m] \\ & k_{flow} (z_{10}^{up} - z_{10}) \end{aligned} \quad (3)$$

$$\begin{aligned} \frac{d}{dt} e_{10} = & -k_{10}^{on} e_{10} p_{10}^{avail} + k_{10}^{off} e_{10}^m \\ & +k_{z_{10}:e_7^m}^{cat} [Z_{10} : E_7^m] \\ & +(k_{z_7:e_{10}}^{cat} + k_{z_7:e_{10}}^-) [Z_7 : E_{10}] - k_{z_7:e_{10}}^+ e_{10} z_7 \\ & +(k_{z_7^m:e_{10}}^{cat} + k_{z_7^m:e_{10}}^-) [Z_7^m : E_{10}] - k_{z_7^m:e_{10}}^+ e_{10} z_7^m \\ & -k_{TFPI:e_{10}}^+ e_{10} [TFPI] + k_{TFPI:e_{10}}^- [TFPI : E_{10}] \\ & k_{flow} (e_{10}^{up} - e_{10}) \\ & ~~-k_{AT:e_{10}}^{in} e_{10}~~ \\ & -k_{diff} (e_{10} - e_{10}^{ec}) \\ & -k_{TFPI:e_5^h:e_{10}}^+ [TFPI : E_5^h] e_{10} \\ & -k_{TFPI:e_5^h:e_{10}}^- [E_{10} : TFPI : E_5^h] \\ & -k_{TFPI:e_5^{hm}:e_{10}}^+ [TFPI : E_5^{hm}] e_{10} \\ & +k_{TFPI:e_5^{hm}:e_{10}}^- [E_{10} : TFPI : E_5^{hm}] \\ & -k_{e_{10}^{AT}} e_{10} [AT] \\ & +k_{e_{10}^{ATH}} e_{10} [AT : Hep] \end{aligned} \quad (4)$$

$$\begin{aligned} \frac{d}{dt} z_{10}^m &= k_{10}^{on} z_{10} p_{10}^{avail} - k_{10}^{off} z_{10}^m & (5) \\ &+ k_{z_{10}^m : TEN}^+ z_{10}^m [TEN] + k_{z_{10}^m : TEN}^- [Z_{10}^m : TEN] \\ &- k_{z_{10}^m : TEN}^+ z_{10}^m [TEN^*] + k_{z_{10}^m : TEN}^- [Z_{10}^m : TEN^*] \end{aligned}$$

$$\begin{aligned} \frac{d}{dt} e_{10}^m &= k_{10}^{on} e_{10} p_{10}^{avail} - k_{10}^{off} e_{10}^m & (6) \\ &+ k_{z_{10}^m : TEN}^{cat} [Z_{10}^m : TEN] + (k_{z_5^m : e_{10}^m}^{cat} + k_{z_5^m : e_{10}^m}^-) [Z_5^m : E_{10}^m] \\ &- k_{z_5^m : e_{10}^m}^+ e_{10}^m z_5^m + (k_{z_8^m : e_{10}^m}^{cat} + k_{z_8^m : e_{10}^m}^-) [Z_8^m : E_{10}^m] \\ &- k_{z_8^m : e_{10}^m}^+ e_{10}^m z_8^m \\ &+ k_{e_5^m : e_{10}^m}^- [PRO] - k_{e_5^m : e_{10}^m}^p e_{10}^m e_5^m \\ &+ k_{z_{10}^m : TEN}^{cat} [Z_{10}^m : TEN^*] \\ &- k_{e_5^m : e_{10}^m}^+ e_{10}^m e_5^{hm} + k_{e_5^m : e_{10}^m}^- PRO^h \\ &- k_{TFPI : e_{10}^m}^+ e_{10}^m TFPI + k_{TFPI : e_{10}^m}^- [TFPI : E_{10}^m] \\ &- k_{TFPI : e_5^m : e_{10}^m}^+ [TFPI : E_5^{hm}] e_{10}^m \\ &+ k_{TFPI : e_5^m : e_{10}^m}^- [E_{10}^m : TFPI : E_5^{hm}] \\ &- k_{TFPI : e_{10} : e_5^m}^+ [TFPI : E_5^{hm}] e_{10}^m \\ &+ k_{TFPI : e_{10} : e_5^m}^- [TFPI : PRO^h] e_5^m \\ &- k_{e_{10}^m}^{AT} e_{10}^m [AT] \\ &- k_{e_{10}^m}^{ATH} e_{10}^m [AT : Hep] \end{aligned}$$

$$\begin{aligned} \frac{d}{dt} z_5 &= -k_5^{on} z_5 p_5^{avail} + k_5^{off} z_5^m & (7) \\ &- k_{z_5 : e_2}^+ z_5 e_2 + k_{z_5 : e_2}^- [Z_5 : E_2] \\ &k_{flow} (z_5^{up} - z_5) \\ &+ n_5 (k_{adh}^+ p_{PLAS}^{avail} + k_{plu}^{act} ([PL_a^v] + [PL_a^s]) + k_{e_2}^{act} \frac{e_2}{e_2 + 0.001}) [PL] \end{aligned}$$

$$\begin{aligned} \frac{d}{dt} e_5 &= -k_5^{on} e_5 p_5^{avail} + k_5^{off} e_5^m & (8) \\ &+ k_{z_5 : e_2}^{cat} [Z_5 : E_2] \\ &+ k_{flow} (e_5^{up} - e_5) \\ &k_{e_5 : APC}^- [APC : E_5] - k_{e_5 : APC}^+ e_5 [APC] \\ &+ k_{e_5^h : e_2}^{cat} [E_5^h : E_2] \end{aligned}$$

$$\begin{aligned} \frac{d}{dt} z_5^m &= k_5^{on} z_5 p_5^{avail} - k_5^{off} z_5^m & (9) \\ &- k_{z_5^m : e_{10}^m}^+ z_5^m e_{10}^m + k_{z_5^m : e_{10}^m}^- [Z_5^m : E_{10}^m] \\ &- k_{z_5^m : e_2^m}^+ z_5^m e_2^m + k_{z_5^m : e_2^m}^- [Z_5^m : E_2^m] \end{aligned}$$

$$\frac{d}{dt}e_5^m = k_5^{on}e_5p_5^{avail} - k_5^{off}e_5^m \quad (10)$$

$$+k_{z_5^m:e_2^m}^{cat}[Z_5^m : E_2^m]$$

$$+k_{e_5^m:APC}^- [APC : E_5^m]$$

$$-k_{e_5^m:APC}^+ e_5^m [APC]$$

$$-k_{e_5^m:e_{10}^m}^+ e_5^m e_{10}^m + k_{e_5^m:e_{10}^m}^- [PRO]$$

$$+k_{e_5^m:e_2^m}^{cat}[E_5^{hm} : E_2^m]$$

$$\frac{d}{dt}z_8 = -k_8^{on}z_8p_8^{avail} + k_8^{off}z_8^m \quad (11)$$

$$+k_{flow}(z_8^{up} - z_8)$$

$$-k_{z_8:e_2}^+ z_8 e_2 + k_{z_8:e_2}^- [Z_8 : E_2]$$

$$\frac{d}{dt}e_8 = -k_8^{on}e_8p_8^{avail} + k_8^{off}e_8^m \quad (12)$$

$$k_{flow}(e_8^{up} - e_8)$$

$$+k_{z_8:e_2}^{cat} - 0.005e_8$$

$$+k_{e_8:APC}^- [APC : E_8] - k_{e_8:APC}^+ e_8 [APC]$$

$$\frac{d}{dt}z_8^m = k_8^{on}z_8p_8^{avail} - k_8^{off}z_8^m \quad (13)$$

$$-k_{z_8^m:e_{10}^m}^+ z_8^m e_{10}^m + k_{z_8^m:e_{10}^m}^- [Z_8^m : E_{10}^m]$$

$$-k_{z_8^m:e_2^m}^+ z_8^m e_2^m$$

$$+k_{z_8^m:e_2^m}^- [Z_8^m : E_2^m]$$

$$\frac{d}{dt}e_8^m = k_8^{on}e_8p_8^{avail} - k_8^{off}e_8^m \quad (14)$$

$$k_{z_8^m:e_{10}^m}^{cat}[Z_8^m : E_{10}^m] + k_{z_8^m:e_2^m}^{cat}[Z_8^m : E_2^m]$$

$$-k_{e_8^m:APC}^+ e_8^m [APC] + k_{e_8^m:APC}^- [APC : E_8^m]$$

$$-k_{e_8^m:e_9^m}^+ e_8^m e_9^m + k_{e_8^m:e_9^m}^- [TEN] - 0.005e_8^m$$

$$-k_{e_8^m:e_9^m}^+ e_8^m e_9^m + k_{e_8^m:e_9^m}^- [TEN]$$

$$\frac{d}{dt}z_9 = k_{flow}(z_9^{up} - z_9) - k_9^{on}p_9^{avail}z_9 + k_9^{off}z_9^m \quad (15)$$

$$-k_{z_9:e_7^m}^+ z_9 e_7^m + k_{z_9:e_7^m}^- [Z_9 : E_7^m]$$

$$-k_{z_9:e_{11}^h}^+ e_{11}^h + k_{z_9:e_{11}^h}^- [Z_9 : E_{11}^h]$$

$$-k_{z_9:e_{11}^h}^+ z_9 e_{11}^h + k_{z_9:e_{11}^h}^- [Z_9 : E_{11}^h]$$

$$\frac{d}{dt}e_9 = f_{flow}(e_9^{up} - e_9) \quad (16)$$

$$\begin{aligned} & -k_9^{on} p_9^{avail} e_9 + k_9^{off} e_9^m \\ & k_{z_9:e_7}^{cat} [Z_9 : E_7^m] \\ & \cancel{-k_{AT:e_9}^{in} e_9} - k_{z_7:e_9}^+ z_7 e_9 \\ & + (k_{z_7:e_9}^{cat} + k_{z_7:e_9}^-) [Z_7 : E_9] \\ & + (k_{z_7^m:e_9}^{cat} + k_{z_7^m:e_9}^-) [Z_7^m : E_9] - k_{z_7^m:e_9}^+ z_7^m e_9 \\ & - k_9^{on} p_9^{*,avail} e_9 + k_9^{off} e_9^{m*} \\ & - k_{diff}(e_9 - e_9^{ec}) \\ & + k_{z_9:e_{11}^h}^{cat} [Z_9 : E_{11}^h] + k_{z_9:e_{11}}^{cat} [Z_9 : E_{11}] \\ & - k_{e_9}^{AT} e_9 [AT] \\ & - k_{e_9}^{ATH} e_9 [AT : Hep] \end{aligned}$$

$$\frac{d}{dt}z_9^m = k_9^{on} p_9^{avail} z_9 - k_9^{off} z_9^m \quad (17)$$

$$\begin{aligned} & -k_{z_9^m:e_{11}^{h,m}}^+ z_9^m e_{11}^{h,m} + k_{z_9^m:e_{11}^{h,m}}^- [Z_9^m : E_{11}^{h,m}] \\ & -k_{z_9^m:e_{11}^{m*}}^+ z_9^m e_{11}^{m*} + k_{z_9^m:e_{11}^{m*}}^- [Z_9^m : E_{11}^{m*}] \end{aligned}$$

$$\frac{d}{dt}e_9^m = k_9^{on} p_9^{avail} e_9 - k_9^{off} e_9^m \quad (18)$$

$$\begin{aligned} & -k_{e_8^m:e_9^m}^+ e_8^m e_9^m + k_{e_8^m:e_9^m}^- [TEN] \\ & + k_{z_9^m:e_{11}^{h,m}}^{cat} [Z_9^m : E_{11}^{h,m}] \\ & + k_{z_9^m:e_{11}^{m*}}^{cat} [Z_9^m : E_{11}^{m*}] \\ & - k_{e_9^m}^{AT} e_9^m [AT] \\ & - k_{e_9^m}^{ATH} e_9^m [AT : Hep] \end{aligned}$$

$$\frac{d}{dt}z_2 = -k_2^{on} p_2^{avail} z_2 + k_2^{off} z_2^m + k_{flow}(z_2^{up} - z_2) \quad (19)$$

$$\frac{d}{dt}e_2 = k_{flow}(e_2^{up} - e_2) \quad (20)$$

$$\begin{aligned} & -k_{z_2^m}^{on} p_{z_2^m}^{*,avail} e_2 + k_{z_2^m}^{off} e_2^m + k_{z_2^m:PRO}^{cat} [Z_2^m : PRO] \\ & \cancel{-k_{AT:e_2}^{in} e_2} - k_{z_5:e_2}^+ z_5 e_2 + (k_{z_5:e_2}^{cat} + k_{z_5:e_2}^-) [Z_5 : E_2] \\ & -k_{z_8:e_2}^+ z_8 e_2 + (k_{z_8:e_2}^{cat} + k_{z_8:e_2}^-) [Z_8 : E_2] \\ & -k_{z_7:e_2}^+ z_7 e_2 + (k_{z_7:e_2}^{cat} + k_{z_7:e_2}^-) [Z_7 : E_2] \\ & -k_{z_7^m:e_2}^+ z_7^m e_2 + (k_{z_7^m:e_2}^{cat} + k_{z_7^m:e_2}^-) [Z_7^m : E_2] \\ & -k_{diff}(e_2 - e_2^{ec}) \\ & -k_{z_{11}:e_2}^+ z_{11} + (k_{z_{11}:e_2}^- + k_{z_{11}:e_2}^{cat}) [Z_{11} : E_2] \\ & -k_{e_{11}:e_2}^+ e_{11}^h e_2 + (k_{e_{11}:e_2}^- + k_{e_{11}:e_2}^{cat}) [E_{11}^h : E_2] \\ & + k_{z_2^m:PRO^h}^{cat} [Z_2^m : PRO^h] - k_{e_5^h:e_2}^+ e_2 e_5^h \\ & + k_{e_5^h:e_2}^- [E_5^h : E_2] + k_{e_5^h:e_2}^{cat} [E_5^h : E_2] \\ & - k_{e_2}^{AT} e_2 [AT] \\ & - k_{e_2}^{ATH} e_2 [AT : Hep] \end{aligned}$$

$$\begin{aligned} \frac{d}{dt} z_2^m &= k_2^{on} p_2^{avail} z_2 - k_2^{off} z_2^m & (21) \\ &- k_{z_2^m:PRO}^+ z_2^m [PRO] + k_{z_2^m:PRO}^- [Z_2^m : PRO] \\ &- k_{z_2^m:PRO^h}^+ z_2^m PRO^h + k_{z_2^m:PRO^h}^- [Z_2^m : PRO^h] \end{aligned}$$

$$\begin{aligned} \frac{d}{dt} e_2^m &= k_{2*}^{on} p_2^{avail} e_2 - k_{2*}^{off} e_2^m & (22) \\ &+ (k_{z_5^m:e_2^m}^{cat} + k_{z_5^m:e_2^m}^-) [Z_5^m : E_2^m] \\ &- k_{z_5^m:e_2^m}^+ z_5^m e_2^m \\ &+ (k_{z_8^m:e_2^m}^{cat} + k_{z_8^m:e_2^m}^-) [Z_8^m : E_2^m] - k_{z_8^m:E_2^m}^+ z_8^m e_2^m \\ &- k_{z_{11}^m:e_2^m}^+ z_{11}^m e_2^m \\ &+ (k_{z_{11}^m:e_2^m}^- + k_{z_{11}^m:e_2^m}^{cat}) [Z_{11}^m : E_2^m] \\ &- k_{e_{11}^{h,m^*} e_2^m}^+ e_{11}^{h,m^*} e_2^m \\ &+ (k_{e_{11}^{h,m^*} e_2^m}^- + k_{e_{11}^{h,m^*} e_2^m}^{cat}) [E_{11}^{hms} : E_2^m] \\ &- k_{e_5^{hm,e_2^m}}^+ e_5^{hm} e_2^m + k_{e_5^{hm,e_2^m}}^- [E_5^{hm} : E_2^m] \\ &+ k_{e_5^{hm,e_2^m}}^{cat} [E_5^{hm} : E_2^m] \\ &- k_{PRO^h:e_2^m}^+ PRO^h e_2^m + k_{PRO^h:e_2^m}^- [PRO^h : E_2^m] \\ &+ k_{PRO^h:e_2^m}^{cat} [PRO^h : E_2^m] \\ &- k_{e_2^m}^{AT} e_2^m [AT] \\ &- k_{e_2^m}^{ATH} e_2^m [AT : Hep] \end{aligned}$$

$$\begin{aligned} \frac{d}{dt} [TEN] &= -k_{e_8^m:e_9^m}^- [TEN] + k_{e_8^m:e_9^m} e_8^m e_9^m & (23) \\ &+ (k_{z_{10}^m:TEN}^{cat} + k_{z_{10}^m:TEN}^-) [Z_{10}^m : TEN] - k_{z_{10}^m:TEN}^+ z_{10}^m [TEN] \end{aligned}$$

$$\begin{aligned} \frac{d}{dt} [PRO] &= -k_{e_5^m:e_{10}^m}^- [PRO] + k_{e_5^m:e_{10}^m}^+ e_{10}^m e_5^m & (24) \\ &+ (k_{z_2^m:PRO}^{cat} + k_{z_2^m:PRO}^-) [Z_2^m : PRO] - k_{z_2^m:PRO}^+ z_2^m [PRO] \\ &+ k_{PRO^h:e_2^m}^{cat} [PRO^h : E_2^m] \end{aligned}$$

$$\begin{aligned} \frac{d}{dt} [PL_a^s] &= k_{adh}^+ p_{PLAS}^{avail} [PL] - k_{adh}^- [PL_a^s] & (25) \\ &+ k_{adh}^+ [PL_a^v] * p_{PLAS}^{avail} \end{aligned}$$

$$\begin{aligned} \frac{d}{dt} [PL] &= k_{flow}^p ([PL]^{up} - [PL]) & (26) \\ &- k_{adh}^+ p_{PLAS}^{avail} + (k_{plt}^{act} ([PL_a^v] + [PL_a^s]) + k_{e_2}^{act} \frac{e_2}{e_2 + 0.001}) [PL] \end{aligned}$$

$$\begin{aligned} \frac{d}{dt} [PL_a^v] &= k_{adh}^- [PL_a^s] - k_{adh}^+ [PL_a^v] p_{PLAS}^{avail} & (27) \\ &+ (k_{plt}^{act} ([PL_a^v] + [PL_a^s]) + k_{e_2}^{act} \frac{e_2}{e_2 + 0.001}) [PL] \end{aligned}$$

$$\begin{aligned} \frac{d}{dt} z_7^m &= k_7^{on} z_7 [TF]^{avail} - k_7^{off} z_7^m & (28) \\ &- k_{z_7^m:e_{10}^m}^+ z_7^m e_{10} - k_{z_7^m:e_2}^+ z_7^m e_2 \\ &+ k_{z_7^m:e_{10}^m}^- [Z_7^m : E_{10}] + k_{z_7^m:e_2}^- [Z_7^m : E_2] \\ &- k_{z_7^m:e_9}^+ z_7^m e_9 + k_{z_7^m:e_9}^- [Z_7^m : E_9] \\ &- z_7^m \frac{d}{dt} [PL_a^s] \frac{1}{p_{PLAS}^{avail}} \end{aligned}$$



$$\frac{d}{dt}e_7^m = k_7^{on}e_7[TF]^{avail} - k_7^{off}e_7^m \quad (29)$$

$$\begin{aligned} & k_{TFPI:e_{10}:e_7^m}^+ e_7^m [TFPI : E_{10}] + k_{TFPI:e_{10}:e_7^m}^- [TFPI : E_7^m] \\ & + k_{z_7^m:e_{10}}^{cat} [Z_7^m : E_{10}] + k_{z_7^m:e_2}^{cat} [Z_7^m : E_2] \\ & + (k_{z_{10}:e_7^m}^{cat} + k_{z_{10}:e_7^m}^-) [Z_{10} : E_7^m] \\ & - k_{z_{10}:e_7^m}^+ e_7^m z_{10} - k_{z_9:e_7^m}^+ e_7^m z_9 \\ & + (k_{z_9:e_7^m}^{cat} + k_{z_9:e_7^m}^-) [Z_9 : E_7^m] \\ & + k_{z_7^m:e_9}^{cat} [Z_7^m : E_9] - e_7^m \frac{d}{dt} [PL_a^s] \frac{1}{P_{PLAS}^{avail}} \end{aligned} \quad (30)$$

$$\begin{aligned} \frac{d}{dt}[TFPI] &= -k_{TFPI:e_{10}}^+ e_{10}[TFPI] + k_{TFPI:e_{10}}^- [TFPI : E_{10}] \\ & k_{flow}([TFPI]^{up} - [TFPI]) \\ & -k_{TFPI:e_5^{hm}}^+ e_5^{hm}[TFPI] + k_{TFPI:e_5^{hm}}^- [TFPI : E_5^{hm}] \\ & -k_{TFPI:e_5^h}^+ e_5^h[TFPI] + k_{TFPI:e_5^h}^- [TFPI : E_5^h] \\ & -k_{TFPI:e_{10}^m}^+ e_{10}^m[TFPI] + k_{TFPI:e_{10}^m}^- [TFPI : E_{10}^m] \\ & -k_{TFPI:PRO^h:v_{10}}^+ PRO^h[TFPI] \\ & +k_{TFPI:PRO^h:v_{10}}^- [TFPI : PRO^h]^{v_{10}} \\ & -k_{TFPI:PRO^h:v_5}^+ PRO^h[TFPI] \\ & +k_{TFPI:PRO^h:v_5}^- [TFPI : PRO^h]^{v_5} \end{aligned} \quad (31)$$

$$\begin{aligned} \frac{d}{dt}[TFPI : E_{10}] &= k_{TFPI:e_{10}}^+ e_{10}[TFPI] - k_{TFPI:e_{10}}^- [TFPI : E_{10}] \\ & +k_{TFPI:e_{10}:e_7^m}^- [TFPI : E_{10} : E_7^m] \\ & -k_{TFPI:e_{10}:e_7^m}^+ e_7^m [TFPI : E_{10}] + k_{flow}([TFPI : E_{10}]^{up} - [TFPI : E_{10}]) \\ & -k_{TFPI:e_{10}:e_5^h}^+ [TFPI : E_{10}] e_5^h \\ & +k_{TFPI:e_{10}:e_5^h}^- [E_{10} : TFPI : E_5^h] \\ & -k_{10}^{on}[TFPI : E_{10}] p_{10}^{avail} + k_{10}^{off} [TFPI : E_{10}^m] \end{aligned} \quad (32)$$

$$\begin{aligned} \frac{d}{dt}[TFPI : E_{10} : E_7^m] &= -k_{TFPI:e_{10}:e_7^m}^- [TFPI : E_{10} : E_7^m] + k_{TFPI:e_{10}:e_7^m}^+ e_7^m [TFPI : E_{10}] \\ & - [TFPI : E_{10} : E_7^m] \frac{d}{dt} [PL_a^s] \frac{1}{P_{PLAS}^{avail}} \end{aligned} \quad (32)$$

$$\begin{aligned} \frac{d}{dt}[APC] &= (k_{e_5^m:APC}^{cat} + k_{e_5^m:APC}^-) [APC : E_5^m] - k_{e_5^m:APC}^{cat} e_5^m \\ & + (k_{e_8^m:APC}^{cat} + k_{e_8^m:APC}^-) [APC : E_8^m] - k_{e_8^m:APC}^{cat} e_8^m [APC] \\ & + k_{flow}([APC]^{up} - [APC]) - k_{diff}([APC] - [APC^{ec}]) \\ & + (k_{e_5:APC}^{cat} + k_{e_5:APC}^-) [APC : E_5] - k_{e_5:APC}^+ e_5 [APC] \\ & + (k_{e_8:APC}^{cat} + k_{e_8:APC}^-) [APC : E_8] - k_{e_8:APC}^+ e_8 [APC] \\ & - k_{e_5^m:APC}^+ e_5^{hm} APC + k_{e_5^m:APC}^- [APC : E_5^{hm}] \\ & + k_{e_5^m:APC}^{cat} [APC : E_5^{hm}] - k_{e_5^h:APC}^+ e_5^h APC \\ & + k_{e_5^h:APC}^- [APC : E_5^h] + k_{e_5^h:APC}^{cat} [APC : E_5^h] \end{aligned} \quad (33)$$

$$\begin{aligned} \frac{d}{dt}[Z_7 : E_2] &= k_{flow}([Z_7 : E_2]^{up} - [Z_7 : E_2]) + k_{z_7:e_2}^+ e_2 z_7 \\ &\quad - (k_{z_7:e_2}^{cat} + k_{z_7:e_2}^-)[Z_7 : E_2] \end{aligned} \quad (34)$$

$$\begin{aligned} \frac{d}{dt}[Z_7 : E_{10}] &= k_{z_7:e_{10}}^+ e_{10} z_7 - (k_{z_7:e_{10}}^{cat} + k_{z_7:e_{10}}^-)[Z_7 : E_{10}] \\ &\quad + k_{flow}([Z_7 : E_{10}]^{up} - [Z_7 : E_{10}]) \end{aligned} \quad (35)$$

$$\begin{aligned} \frac{d}{dt}[Z_7^m : E_{10}] &= k_{z_7^m:e_{10}}^+ e_{10} z_7^m \\ &\quad - (k_{z_7^m:e_{10}}^{cat} + k_{z_7^m:e_{10}}^-)[Z_7^m : E_{10}] - [Z_7^m : E_{10}] \frac{d}{dt}[PL_a^s] \frac{1}{P_{PLAS}^{avail}} \end{aligned} \quad (36)$$

$$\begin{aligned} \frac{d}{dt}[Z_7^m : E_2] &= k_{z_7^m:e_2}^+ e_2 z_7^m - (k_{z_7^m:e_2}^{cat} + k_{z_7^m:e_2}^-)[Z_7^m : E_2] \\ &\quad - [Z_7^m : E_2] \frac{d}{dt}[PL_a^s] \frac{1}{P_{PLAS}^{avail}} \end{aligned} \quad (37)$$

$$\begin{aligned} \frac{d}{dt}[Z_{10} : E_7^m] &= k_{z_{10}:e_7^m}^+ e_7^m z_{10} - (k_{z_{10}:e_7^m}^{cat} + k_{z_{10}:e_7^m}^-)[Z_{10} : E_7^m] \\ &\quad - [Z_{10} : E_7^m] \frac{d}{dt}[PL_a^s] \frac{1}{P_{PLAS}^{avail}} \end{aligned} \quad (38)$$

$$\frac{d}{dt}[Z_{10}^m : TEN] = k_{z_{10}^m:TEN}^+ z_{10}^m [TEN] - (k_{z_{10}^m:TEN}^{cat} + k_{z_{10}^m:TEN}^-)[Z_{10}^m : TEN] \quad (39)$$

$$\begin{aligned} \frac{d}{dt}[Z_5 : E_2] &= k_{z_5:e_2}^+ e_2 z_5 - (k_{z_5:e_2}^{cat} + k_{z_5:e_2}^-)[Z_5 : E_2] \\ &\quad + k_{flow}([Z_5 : E_2]^{up} - [Z_5 : E_2]) \end{aligned} \quad (40)$$

$$\frac{d}{dt}[Z_5^m : e_{10}^m] = k_{z_5^m:e_{10}^m}^+ e_{10}^m z_5^m - (k_{z_5^m:e_{10}^m}^{cat} + k_{z_5^m:e_{10}^m}^-)[Z_5^m : E_{10}^m] \quad (41)$$

$$\frac{d}{dt}[Z_5^m : E_2^m] = k_{z_5^m:e_2^m}^+ e_2^m z_5^m - (k_{z_5^m:e_2^m}^{cat} + k_{z_5^m:e_2^m}^-)[Z_5^m : E_2^m] \quad (42)$$

$$\frac{d}{dt}[Z_8^m : E_{10}^m] = k_{z_8^m:e_{10}^m}^+ e_{10}^m z_8^m - (k_{z_8^m:e_{10}^m}^{cat} + k_{z_8^m:e_{10}^m}^-)[Z_8^m : E_{10}^m] \quad (43)$$

$$\frac{d}{dt}[Z_8^m : E_2^m] = k_{z_8^m:e_2^m}^+ e_2^m z_8^m - (k_{z_8^m:e_2^m}^{cat} + k_{z_8^m:e_2^m}^-)[Z_8^m : E_2^m] \quad (44)$$

$$\begin{aligned} \frac{d}{dt}[Z_8 : E_2] &= k_{z_8:e_2}^+ e_2 z_8 - (k_{z_8:e_2}^{cat} + k_{z_8:e_2}^-)[Z_8 : E_2] \\ &\quad + k_{flow}([Z_8 : E_2]^{up} - [Z_8 : E_2]) \end{aligned} \quad (45)$$

$$\frac{d}{dt}[APC : E_8^m] = k_{e_8^m:APC}^+ e_8^m [APC] - (k_{e_8^m:APC}^{cat} + k_{e_8^m:APC}^-)[APC : E_8^m] \quad (46)$$

$$\begin{aligned} \frac{d}{dt}[Z_9 : E_7^m] &= k_{z_9:e_7^m}^+ e_7^m z_9 - (k_{z_9:e_7^m}^{cat} + k_{z_9:e_7^m}^-)[Z_9 : E_7^m] \\ &\quad - [Z_9 : E_7^m] \frac{d}{dt}[PL_a^s] \frac{1}{P_{PLAS}^{avail}} \end{aligned} \quad (47)$$

$$\frac{d}{dt}[Z_2^m : PRO] = k_{z_2^m:PRO}^+ z_2^m [PRO] - (k_{z_2^m:PRO}^{cat} + k_{z_2^m:PRO}^-)[Z_2^m : PRO] \quad (48)$$

$$\frac{d}{dt}[APC : E_5^m] = k_{e_5^m:APC}^+ e_5^m [APC] - (k_{e_5^m:APC}^{cat} + k_{e_5^m:APC}^-)[APC : E_5^m] \quad (49)$$

$$\frac{d}{dt}[TF] = -[TF] \frac{d}{dt}[PL_a^s] \frac{1}{P_{PLAS}^{avail}} \quad (50)$$

$$\frac{d}{dt}[Z_7 : E_9] = k_{z_7:e_9}^+ e_9 z_7 - (k_{z_7:e_9}^{cat} + k_{z_7:e_9}^-)[Z_7 : E_9] \quad (51)$$

$$\begin{aligned} \frac{d}{dt}[Z_7^m : E_9] &= k_{z_7^m:e_9}^+ e_9 z_7^m - (k_{z_7^m:e_9}^{cat} + k_{z_7^m:e_9}^-)[Z_7^m : E_9] \\ &\quad - [Z_7^m : E_9] \frac{d}{dt}[PL_a^s] \frac{1}{P_{PLAS}^{avail}} \end{aligned} \quad (52)$$

$$\begin{aligned} \frac{d}{dt}e_9^{m*} &= k_9^{on}p_9^{*,avail}e_9 - k_9^{off}e_9^{m*} + k_{e_8^m:e_9^m}^- [TEN^*] \\ &\quad - k_{e_8^m:e_9^m}^+ e_8^m e_9^{m*} \\ &\quad - k_{e_9^m}^{AT} e_9^{m*} [AT] \\ &\quad - k_{E_9^m}^{ATH} e_9^{m*} [AT : Hep] \end{aligned} \quad (53)$$

$$\begin{aligned} \frac{d}{dt}[TEN^*] &= -k_{e_8^m:e_9^m}^- [TEN^*] + k_{e_8^m:e_9^m}^+ e_8^m e_9^{m*} \\ &\quad + (k_{z_{10}^m:TEN}^{cat} + k_{z_{10}^m:TEN}^-) [Z_{10}^m : TEN^*] \\ &\quad + k_{z_{10}^m:TEN}^+ [TEN^*] z_{10}^m \end{aligned} \quad (54)$$

$$\frac{d}{dt}[Z_{10}^m : TEN^*] = k_{z_{10}^m:TEN}^+ [TEN^*] z_{10}^m - (k_{z_{10}^m:TEN}^{cat} + k_{z_{10}^m:TEN}^-) [Z_{10}^m : TEN^*] \quad (55)$$

$$\begin{aligned} \frac{d}{dt}e_2^{ec} &= k_{diff}(e_2 - e_2^{ec}) + k_{flow}(e_2^{ec,up} - e_2^{ec}) \\ &\quad - \cancel{k_{AT:e_2}^{in} e_2^{ec}} \\ &\quad - k_{TM}^{on} e_2^{ec} [TM]^{avail} + k_{TM}^{off} [TM : E_2^{ec}] - k_{e_2^{ec}}^{AT} e_2^{ec} [AT] \end{aligned} \quad (56)$$

$$\begin{aligned} \frac{d}{dt}[APC^{ec}] &= k_{flow}([APC]^{up} - [APC^{ec}]) + k_{diff}([APC] - [APC^{ec}]) \\ &\quad + k_{PC:TM:e_2}^{cat} [TM : E_2^{ec} : APC] \end{aligned} \quad (57)$$

$$\begin{aligned} \frac{d}{dt}[TM : E_2^{ec}] &= k_{TM}^+ [E_2^{ec}] (1 - [TM : E_2^{ec}] - [TM : E_2^{ec} : APC]) \\ &\quad - k_{TM}^- [TM : E_2^{ec}] - k_{PC:TM:e_2}^+ [TM : E_2^{ec}] \\ &\quad + (k_{PC:TM:e_2}^- + k_{PC:TM:e_2}^{cat}) [TM : E_2^{ec} : APC] \end{aligned} \quad (58)$$

$$\begin{aligned} \frac{d}{dt}[TM : E_2^{ec} : APC] &= k_{PC:TM:e_2}^+ [TM : E_2^{ec}] \\ &\quad - (k_{PC:TM:e_2}^- + k_{PC:TM:e_2}^{cat}) [TM : E_2^{ec} : APC] \end{aligned} \quad (59)$$

$$\begin{aligned} \frac{d}{dt}e_9^{ec} &= k_{diff}(e_9 - e_9^{ec}) + k_{flow}(e_9^{up} - e_9^{ec}) \\ &\quad - \cancel{k_{AT:e_9}^{in} e_9^{ec}} - k_{e_9^{ec}}^{AT} e_9^{ec} [AT] \end{aligned} \quad (60)$$

$$\begin{aligned} \frac{d}{dt}e_{10}^{ec} &= k_{diff}(e_{10} - e_{10}^{ec}) + k_{flow}(e_{10}^{up} - e_{10}^{ec}) \\ &\quad - \cancel{k_{AT:e_{10}}^{in} e_{10}^{ec}} - k_{e_{10}^{ec}}^{AT} e_{10}^{ec} [AT] \end{aligned} \quad (61)$$

$$\frac{d}{dt}[APC : E_5] = -(k_{e_5:APC}^{cat} + k_{e_5:APC}^-) [APC : E_5] + k_{e_5:APC}^+ e_5 [APC] \quad (62)$$

$$\frac{d}{dt}[APC : E_8] = -(k_{e_8:APC}^{cat} + k_{e_8:APC}^-) [APC : E_8] + k_{e_8:APC}^+ e_8 [APC] \quad (63)$$

$$\begin{aligned} \frac{d}{dt}z_{11} &= k_{flow}(z_{11}^{up} - z_{11}) - k_{z_{11}}^{on} z_{11} p_{11}^{avail} \\ &\quad + k_{z_{11}}^{off} z_{11}^m - k_{z_{11}:e_{11}^h}^+ z_{11} e_{11}^h \\ &\quad - k_{z_{11}:e_{11}^h}^- [Z_{11} : E_{11}^h] - k_{z_{11}:e_{11}}^+ z_{11} e_{11} \\ &\quad - k_{z_{11}:e_{11}}^- [Z_{11} : E_{11}] - k_{z_{11}:e_2}^+ z_{11} e_2 \\ &\quad - k_{z_{11}:e_2}^- [Z_{11} : E_2] \end{aligned} \quad (64)$$

$$\frac{d}{dt}e_{11} = k_{flow}(e_{11}^{up} - e_{11}) \quad (65)$$

$$\begin{aligned} & -k_{e_{11}^{on.s}}e_{11}p_{111}^{avail} + k_{e_{11}^{off.s}}e_{11}^{m*} \\ & -k_{z_9:e_{11}}^+z_9e_{11} + (k_{z_9:e_{11}}^- + k_{z_9:e_{11}}^{cat})[Z_9 : E_{11}] \\ & -k_{z_{11}:e_{11}}^+z_{11}e_{11} + (k_{z_{11}:e_{11}}^- + k_{z_{11}:e_{11}}^{cat})[Z_{11} : E_{11}] \\ & +k_{e_{11}^h:e_{11}}^{cat}[E_{11}^h : E_{11}^h] - k_{e_{11}^h:e_{11}}^+e_{11}^he_{11} \\ & +(k_{e_{11}^h:e_{11}}^- + 2 * k_{e_{11}^h:e_{11}}^{cat})[E_{11}^h : E_{11}] \\ & +k_{e_{11}^h:e_2}^{cat}[E_{11}^h : E_2] \\ & -k_{e_{11}}^{AT}e_{11}[AT] \\ & -k_{e_{11}}^{ATH}e_{11}[AT : Hep] \end{aligned}$$

$$\frac{d}{dt}z_{11}^m = k_{z_{11}}^{on}z_{11}p_{111}^{avail} - k_{z_{11}}^{off}z_{11}^m \quad (66)$$

$$\begin{aligned} & -k_{z_{11}^m:e_{11}^{h.m}}^+z_{11}^me_{11}^{h,m} + k_{z_{11}^m:e_{11}^{h.m}}^-[Z_{11}^m : E_{11}^{h,m}] \\ & -k_{z_{11}^m:e_{11}^{m*}}^+z_{11}^me_{11}^{m*} + k_{z_{11}^m:e_{11}^{m*}}^-[Z_{11}^m : E_{11}^{m*}] \\ & -k_{z_{11}^m:E_2}^+z_{11}^me_2^m + k_{z_{11}^m:E_2}^-[Z_{11}^m : E_2^m] \end{aligned}$$

$$\frac{d}{dt}e_{11}^{m*} = k_{e_{11}}^{on*}e_{11}p_{111}^{avail} - k_{e_{11}}^{off*}e_{11}^{m*} \quad (67)$$

$$\begin{aligned} & -k_{z_9:e_{11}^{m*}}^+e_{11}^{m*}z_9 \\ & +(k_{z_9:e_{11}^{m*}}^- + k_{z_9:e_{11}^{m*}}^{cat})[Z_9 : E_{11}^{m*}] \\ & -k_{z_{11}^m:e_{11}^{m*}}^+z_{11}^me_{11}^{m*} \\ & +(k_{z_{11}^m:e_{11}^{m*}}^- + k_{z_{11}^m:e_{11}^{m*}}^{cat})[Z_{11}^m : E_{11}^{m*}] \\ & +k_{e_{11}^{h.m*}:e_{11}^{m*}}^+e_{11}^{h,m*}e_{11}^{m*} \\ & +(k_{e_{11}^{h.m*}:e_{11}^{m*}}^- + 2 * k_{e_{11}^{h.m*}:e_{11}^{m*}}^{cat})[E_{11}^{h,m*} : E_{11}^{h,m}] \\ & +k_{e_{11}^{h.m*}:e_2}^{cat}[E_{11}^{h,m*} : E_2^m] \\ & +k_{e_{11}}^{AT}e_{11}^{m*}[AT] \\ & -k_{e_{11}}^{ATH}e_{11}^{m*}[AT : Hep] \end{aligned}$$

$$\frac{d}{dt}[Z_{11}^m : E_2^m] = k_{z_{11}^m:E_2}^+z_{11}^me_2^m - (k_{z_{11}^m:E_2}^- + k_{z_{11}^m:E_2}^{cat})[Z_{11}^m : E_2^m] \quad (68)$$

$$\begin{aligned} \frac{d}{dt}[Z_9^m : E_{11}^{m*}] & = k_{z_9:e_{11}^{m*}}^+z_9^me_{11}^{m*} \\ & - (k_{z_9:e_{11}^{m*}}^- + k_{z_9:e_{11}^{m*}}^{cat})[Z_9^m : E_{11}^{m*}] \end{aligned} \quad (69)$$

$$\begin{aligned} \frac{d}{dt}[Z_{11} : E_2] & = k_{flow}([Z_{11} : E_2]^{up} - [Z_{11} : E_2]) + k_{z_{11}:e_2}^+z_{11}e_2 \\ & - (k_{z_{11}:e_2}^- + k_{z_{11}:e_2}^{cat})[Z_{11} : E_2] \end{aligned} \quad (70)$$

$$\begin{aligned} \frac{d}{dt}[Z_9 : E_{11}] & = k_{flow}([Z_9 : E_{11}]^{up} - [Z_9 : E_{11}]) + k_{z_9:e_{11}}^+z_9e_{11} \\ & - (k_{z_9:e_{11}}^- + k_{z_9:e_{11}}^{cat})[Z_9 : E_{11}] \end{aligned} \quad (71)$$

$$\begin{aligned} \frac{d}{dt}[Z_{11} : E_{11}] & = k_{flow}([Z_{11} : E_{11}]^{up} - [Z_{11} : E_{11}]) + k_{z_{11}:e_{11}}^+z_{11}e_{11} \\ & - (k_{z_{11}:e_{11}}^- + k_{z_{11}:e_{11}}^{cat})[Z_{11} : E_{11}] \end{aligned} \quad (72)$$

$$\begin{aligned}
\frac{d}{dt}e_{11}^h &= k_{e_{11}^h}^{on*}e_{11}^hp_{111}^{avail} + k_{e_{11}^h}^{off*}e_{11}^{h,m*} & (73) \\
&-k_{e_{11}^h}^{on}e_{11}^hp_{11}^{avail} + k_{e_{11}^h}^{off}e_{11}^{h,m} \\
&-k_{z_9:e_{11}^h}^+z_9e_{11}^h + (k_{z_9:e_{11}^h}^- + k_{z_9:e_{11}^h}^{cat})[Z_9 : E_{11}^h] \\
&-k_{z_{11}:e_{11}^h}^+z_{11}e_{11}^h + (k_{z_{11}:e_{11}^h}^- + 2 * k_{z_{11}:e_{11}^h}^{cat})[Z_{11}:E_{11}^h] \\
&+k_{z_{11}:e_{11}^h}^{cat}[Z_{11} : E_{11}] + k_{z_{11}:e_2}^{cat}[Z_{11} : E_2] \\
&-2 * k_{e_{11}^h:e_{11}^h}^+e_{11}^he_{11}^h \\
&+(2 * k_{e_{11}^h:e_{11}^h}^- + k_{e_{11}^h:e_{11}^h}^{cat})[E_{11}^h : E_{11}^h] \\
&-k_{e_{11}^h:e_{11}^h}^+e_{11}^he_{11} + k_{e_{11}^h:e_{11}^h}^-[E_{11}^h : E_{11}] \\
&-k_{e_{11}^h:e_2}^+e_{11}^he_2 + k_{e_{11}^h:e_2}^-[E_{11}^h : E_2] \\
&+k_{flow}(e_{11}^{h,up} - e_{11}^h) \\
&-k_{e_{11}^h}^{AT}e_{11}^h[AT] \\
&-k_{e_{11}^h}^{ATH}e_{11}^h[AT : Hep]
\end{aligned}$$

$$\begin{aligned}
\frac{d}{dt}e_{11}^{h,m} &= k_{e_{11}^h}^{on}e_{11}^hp_{11}^{avail} - k_{e_{11}^h}^{off}e_{11}^{h,m} & (74) \\
&-k_{z_9^m:e_{11}^{h,m}}^+z_9^me_{11}^{h,m} \\
&+(k_{z_9^m:e_{11}^{h,m}}^- + k_{z_9^m:e_{11}^{h,m}}^{cat})[Z_9^m : E_{11}^{h,m}] \\
&-k_{z_{11}^m:e_{11}^{h,m}}^+z_{11}^me_{11}^{h,m} \\
&+(k_{z_{11}^m:e_{11}^{h,m}}^- + 2 * k_{z_{11}^m:e_{11}^{h,m}}^{cat})[Z_{11}^m : E_{11}^{h,m}] \\
&+k_{z_{11}^m:e_{11}^{m*}}^{cat}[Z_{11}^m : E_{11}^{m*}] + k_{z_{11}^m:e_2^m}^{cat}[Z_{11}^m : E_2^m] \\
&-k_{e_{11}^{h,m*}:e_{11}^{h,m}}^+e_{11}^{h,m*}e_{11}^{h,m} \\
&+(k_{e_{11}^{h,m*}:e_{11}^{h,m}}^- + k_{e_{11}^{h,m*}:e_{11}^{h,m}}^{cat})[E_{11}^{h,m*} : E_{11}^{h,m}] \\
&-k_{e_{11}^h}^{AT}e_{11}^{hm}[AT] \\
&-k_{e_{11}^h}^{ATH}e_{11}^{hm}[AT : Hep]
\end{aligned}$$

$$\begin{aligned}
\frac{d}{dt}e_{11}^{h,m*} &= k_{e_{11}^h}^{on*}e_{11}^hp_{111}^{avail} - k_{e_{11}^h}^{off*}e_{11}^{h,m*} & (75) \\
&-k_{e_{11}^{h,m*}:e_{11}^{h,m}}^+e_{11}^{h,m*}e_{11}^{h,m} + k_{e_{11}^{h,m*}:e_{11}^{h,m}}^-[E_{11}^{h,m*} : E_{11}^{h,m}] \\
&-k_{e_{11}^{h,m*}:e_{11}^{m*}}^+e_{11}^{h,m*}e_{11}^{m*} + k_{e_{11}^{h,m*}:e_{11}^{m*}}^-[E_{11}^{h,m*} : E_{11}^{m*}] \\
&-k_{e_{11}^{h,m*}:e_2^m}^+e_{11}^{h,m*}e_2^m + k_{e_{11}^{h,m*}:e_2^m}^-[E_{11}^{h,m*} : E_2^m]
\end{aligned}$$

$$\begin{aligned}
\frac{d}{dt}[Z_9 : E_{11}^h] &= k_{flow}([Z_9 : E_{11}^h]^{up} - [Z_9 : E_{11}^h]) & (76) \\
&+k_{z_9:e_{11}^h}^+z_9e_{11}^h - (k_{z_9:e_{11}^h}^- + k_{z_9:e_{11}^h}^{cat})[Z_9 : E_{11}^h]
\end{aligned}$$

$$\begin{aligned}
\frac{d}{dt}[Z_9^m : E_{11}^{h,m}] &= k_{z_9^m:e_{11}^{h,m}}^+z_9^me_{11}^{h,m} & (77) \\
&-(k_{z_9^m:e_{11}^{h,m}}^- + k_{z_9^m:e_{11}^{h,m}}^{cat})[Z_9^m : E_{11}^{h,m}]
\end{aligned}$$

$$\frac{d}{dt}[Z_{11} : E_{11}^h] = k_{flow}([Z_{11} : E_{11}^h]^{up} - [Z_{11} : E_{11}^h]) \quad (78)$$

$$+k_{z_{11}:e_{11}^{hp}} z_{11} e_{11}^h - (k_{z_{11}:e_{11}^h}^- + k_{z_{11}:e_{11}^h}^{cat})[Z_{11} : E_{11}^h]$$

$$\frac{d}{dt}[E_{11}^h : E_{11}^h] = k_{flow}([E_{11}^h : E_{11}^h]^{up} - [E_{11}^h : E_{11}^h]) \quad (79)$$

$$+k_{e_{11}^h:e_{11}^h}^+ e_{11}^h e_{11}^h - (k_{e_{11}^h:e_{11}^h}^- + k_{e_{11}^h:e_{11}^h}^{cat})[E_{11}^h : E_{11}^h]$$

$$\frac{d}{dt}[E_{11}^h : E_{11}] = k_{flow}([E_{11}^h : E_{11}]^{up} - [E_{11}^h : E_{11}]) \quad (80)$$

$$+k_{e_{11}^h:e_{11}}^+ e_{11}^h - (k_{e_{11}^h:e_{11}}^- + k_{e_{11}^h:e_{11}}^{cat})[E_{11}^h : E_{11}]$$

$$\frac{d}{dt}[E_{11}^h : E_2] = k_{flow}([E_{11}^h : E_2]^{up} - [E_{11}^h : E_2]) \quad (81)$$

$$+k_{e_{11}^h:e_2}^+ e_{11}^h e_2 - (k_{e_{11}^h:e_2}^- + k_{e_{11}^h:e_2}^{cat})[E_{11}^h : E_2]$$

$$\frac{d}{dt}[Z_{11}^m : E_{11}^{h,m}] = k_{z_{11}^m:e_{11}^{h,m}}^+ z_{11}^m e_{11}^{h,m} \quad (82)$$

$$- (k_{z_{11}^m:e_{11}^{h,m}}^- + k_{z_{11}^m:e_{11}^{h,m}}^{cat})[Z_{11}^m : E_{11}^{h,m}]$$

$$\frac{d}{dt}[Z_{11}^m : E_{11}^{m*}] = k_{z_{11}^m:e_{11}^{m*}}^+ z_{11}^m e_{11}^{m*} \quad (83)$$

$$- (k_{z_{11}^m:e_{11}^{m*}}^- + k_{z_{11}^m:e_{11}^{m*}}^{cat})[Z_{11}^m : E_{11}^{m*}]$$

$$\frac{d}{dt}[E_{11}^{hms} : E_{11}^{h,m}] = k_{e_{11}^{h,m*}:e_{11}^{h,m}}^+ e_{11}^{h,m} \quad (84)$$

$$- (k_{e_{11}^{h,m*}:e_{11}^{h,m}}^- + k_{e_{11}^{h,m*}:e_{11}^{h,m}}^{cat})[E_{11}^{hms} : E_{11}^{h,m}]$$

$$\frac{d}{dt}[E_{11}^{hms} : E_{11}^{m*}] = k_{e_{11}^{h,m*}:e_{11}^{m*}}^+ e_{11}^{m*} \quad (85)$$

$$- (k_{e_{11}^{h,m*}:e_{11}^{m*}}^- + k_{e_{11}^{h,m*}:e_{11}^{m*}}^{cat})[E_{11}^{hms} : E_{11}^{m*}]$$

$$\frac{d}{dt}[E_{11}^{hms} : E_2^m] = k_{e_{11}^{h,m*}:e_2^m}^+ e_{11}^{h,m*} e_2^m \quad (86)$$

$$- (k_{e_{11}^{h,m*}:e_2^m}^- + k_{e_{11}^{h,m*}:e_2^m}^{cat})[E_{11}^{hms} : E_2^m]$$

$$\frac{d}{dt}e_5^{hm} = +k_{z_5^m:e_{10}^m}^{cat}[Z_5^m : E_{10}^m] + k_5^{on} e_5^h p_5^{avail} \quad (87)$$

$$- k_5^{off} e_5^{hm} - k_{e_5^{hm}:e_{10}^m}^+ e_{10}^m e_5^{hm} + k_{e_5^{hm}:e_{10}^m}^- PRO^h$$

$$- k_{e_5^{hm}:e_2^m}^+ e_2^m e_5^{hm} + k_{e_5^{hm}:e_2^m}^- [E_5^{hm} : E_2^m]$$

$$- k_{TFPI:e_5^{hm}}^+ e_5^{hm} TFPI + k_{TFPI:e_5^{hm}}^- [TFPI : E_5^{hm}]$$

$$- k_{e_5^{hm}:APC}^+ e_5^{hm} APC + k_{e_5^{hm}:APC}^- [APC : E_5^{hm}]$$

$$- k_{TFPI:e_{10}:e_5^{hm}}^+ [TFPI : E_{10}^m] e_5^{hm}$$

$$+ k_{TFPI:e_{10}:e_5^{hm}}^- [E_{10}^m : TFPI : E_5^{hm}]$$

$$- k_{TFPI:e_{10}:e_5^{hm}:e_{10}^m}^+ [TFPI : E_{10}^m] e_5^{hm}$$

$$+ k_{TFPI:e_{10}:e_5^{hm}:e_{10}^m}^- [TFPI : PRO_{v10}^h]$$

$$\frac{d}{dt}e_5^h = -k_{son}e_5^h p_5^{avail} + k_5^{off} e_5^{hm} \quad (88)$$

$$\begin{aligned} &+k_{flow}(e_5^{up} - e_5^h) + (1 - f_5)N_5 dpl \cdot p \\ &-k_{e_5^h:e_2}^+ e_5^h + k_{e_5^h:e_2}^- [E_5^h : E_2] \\ &-k_{e_5^h:APC}^+ APC \cdot e_5^h + k_{e_5^h:APC}^- [APC : E_5^h] \\ &-k_{TFPI:e_5^h}^+ e_5^h TFPI \\ &+k_{TFPI:e_5^h}^- [TFPI : E_5^h] \\ &-k_{TFPI:e_{10}:e_5^h}^+ [TFPI : E_{10}]e_5^h \\ &+k_{TFPI:e_{10}:e_5^h}^- [E_{10} : TFPI : E_5^h] \\ &-k_{TFPI:e_{10}^m:e_5^h}^+ [TFPI : E_{10}^m]e_5^h \\ &+k_{TFPI:e_{10}^m:e_5^h}^- [E_{10}^m : TFPI : E_5^h] \end{aligned}$$

$$\frac{d}{dt}PRO^h = +k_{e_5^{hm}:e_{10}^m}^+ e_{10}^m e_5^{hm} - k_{e_5^{hm}:e_{10}^m}^- PRO^h \quad (89)$$

$$\begin{aligned} &-k_{z_2^m:PRO^h}^+ PRO^h z_2^m + k_{z_2^m:PRO^h}^- [Z_2^m : PRO^h] \\ &+k_{z_2^m:PRO^h}^{cat} [Z_2^m : PRO^h] \\ &-k_{TFPI:PRO^h:v_{10}}^+ PRO^h TFPI + k_{TFPI:PRO^h:v_{10}}^- [TFPI : PRO_{v_{10}}^h] \\ &-k_{TFPI:PRO^h:v_5}^+ PRO^h TFPI + k_{TFPI:PRO^h:v_5}^- [TFPI : PRO_{v_5}^h] \\ &-k_{PRO^h:e_2^m}^+ PRO^h e_2^m + k_{PRO^h:e_2^m}^- [PRO^h : E_2^m] \end{aligned}$$

$$\frac{d}{dt}[Z_2^m : PRO^h] = +k_{z_2^m:PRO^h}^+ PRO^h z_2^m - k_{z_2^m:PRO^h}^- [Z_2^m : PRO^h] \quad (90)$$

$$-k_{z_2^m:PRO^h}^{cat} [Z_2^m PRO^h]$$

$$\frac{d}{dt}[E_5^{hm} : E_2^m] = +k_{e_5^{hm}:e_2^m}^+ e_2^m e_5^{hm} - k_{e_5^{hm}:e_2^m}^- [E_5^{hm} : E_2^m] \quad (91)$$

$$-k_{e_5^{hm}:e_2^m}^{cat} [E_5^{hm} : E_2^m]$$

$$\frac{d}{dt}[E_5^h : E_2] = +k_{e_5^h:e_2}^+ e_2 e_5^h - k_{TFPI:e_5^h}^- [E_5^h : E_2] \quad (92)$$

$$-k_{e_5^h:e_2}^{cat} [E_5^h : E_2] + k_{flow}([E_5^h : E_2]^{up} - [E_5^h : E_2])$$

$$\frac{d}{dt}[TFPI : E_5^{hm}] = +k_{TFPI:e_5^{hm}}^+ e_5^{hm} TFPI - k_{TFPI:e_5^{hm}}^- [TFPI : E_5^{hm}] \quad (93)$$

$$-k_{TFPI:e_5^{hm}:e_{10}^m}^+ [TFPI : E_5^{hm}]e_{10}^m$$

$$+k_{TFPI:e_5^{hm}:e_{10}^m}^- [E_{10}^m : TFPI : E_5^{hm}]$$

$$+k_5^{on} [TFPI : E_5^h] p_5^{avail} - k_5^{off} [TFPI : E_5^{hm}]$$

$$-k_{TFPI:e_{10}:e_5^{hm}}^+ [TFPI : E_5^{hm}]e_{10}^m$$

$$+k_{TFPI:e_{10}:e_5^{hm}}^- [TFPI : PRO_{v_5}^h]$$

$$-k_{TFPI:e_5^{hm}:e_{10}}^+ [TFPI : E_5^{hm}]e_{10}$$

$$+k_{TFPI:e_5^{hm}:e_{10}}^- [E_{10} : TFPI : E_5^{hm}]$$

$$\frac{d}{dt}[APC : E_5^{hm}] = +k_{e_5^{hm}:APC}^+ E_5^{hm} APC - k_{e_5^{hm}:APC}^- [APC : E_5^{hm}] \quad (94)$$

$$+k_{e_5^{hm}:APC}^{cat} [APC : E_5^{hm}]$$

$$\frac{d}{dt}[APC : E_5^h] = +k_{e_5^h:APC}^+ e_5^h APC - k_{e_5^{hm}:APC}^- [APC : E_5^h] \quad (95)$$

$$-k_{e_5^h:APC}^{cat} [APC : E_5^h]$$

$$+k_{flow}([APC : E_5^h]^{up} - [APC : E_5^h])$$

$$\frac{d}{dt}[TFPI : E_5^h] = +k_{TFPI:e_5^h up} e_5^h TFPI - k_{kTFPI:e_5^h}^- [TFPI : E_5^h] \quad (96)$$

$$+k_{flow}([TFPI : E_5^h]^{up} - [TFPI : E_5^h])$$

$$-k_{TFPI:e_5^h:e_{10}}^+ [TFPI : E_5^h] e_{10}$$

$$+k_{TFPI:e_5^h:e_{10}}^- [E_{10} : TFPI : E_5^h]$$

$$+k_5^{on} [TFPI : E_5^h] p_5^{avail} + k_5^{off} [TFPI : E_5^{hm}]$$

$$\frac{d}{dt}[TFPI : E_{10}^m] = +k_{TFPI:e_{10}^m}^+ e_{10}^m TFPI - k_{TFPI:e_{10}^m}^- [TFPI : E_{10}^m] \quad (97)$$

$$-k_{TFPI:e_{10}^m:e_5^h}^+ [TFPI : E_{10}^m] e_5^{hm}$$

$$+k_{TFPI:e_{10}^m:e_5^h}^- [E_{10}^m : TFPI : E_5^{hm}]$$

$$+k_{10}^{on} [TFPI : E_{10}^m] p_{10}^{avail}$$

$$-k_{10}^{off} [TFPI : E_{10}^m]$$

$$-k_{TFPI:e_{10}^m:e_5^h}^+ [TFPI : E_{10}^m] e_5^{hm}$$

$$+k_{TFPI:e_{10}^m:e_5^h}^- [TFPI : PRO^h]^{v10}$$

$$-k_{TFPI:e_{10}^m:e_5^h}^+ [TFPI : E_{10}^m] e_5^h$$

$$+k_{TFPI:e_{10}^m:e_5^h}^- [E_{10}^m : TFPI : E_5^h]$$

$$\frac{d}{dt}[TFPI : PRO^h]^{v10} = +k_{TFPI:PRO^h:v_{10}}^+ PRO^h TFPI \quad (98)$$

$$-k_{TFPI:PRO^h:v_{10}}^- [TFPI : PRO^h]^{v10}$$

$$+k_{TFPI:e_{10}^m:e_5^h}^+ [TFPI : E_{10}^m] [TFPI : E_{10}^m] e_5^{hm}$$

$$-k_{TFPI:e_{10}^m:e_5^h}^- [TFPI : PRO^h]^{v10}$$

$$\frac{d}{dt}[TFPI : PRO^h]^{v5} = +k_{TFPI:PRO^h:v_5}^+ PRO^h TFPI \quad (99)$$

$$-k_{TFPI:PRO^h:v_5}^- [TFPI : PRO^h]^{v5}$$

$$+k_{TFPI:e_{10}^m:e_5^h}^+ [TFPI : E_5^{hm}] e_{10}^m$$

$$-k_{TFPI:e_{10}^m:e_5^h}^- [TFPI : PRO^h]^{v5}$$

$$\frac{d}{dt}[E_{10}^m : TFPI : E_5^{hm}] = +k_{TFPI:e_{10}^m:e_5^h}^+ [TFPI : E_{10}^m] e_5^{hm} \quad (100)$$

$$-k_{TFPI:e_{10}^m:e_5^h}^- [E_{10}^m : TFPI : E_5^{hm}]$$

$$+k_{TFPI:e_5^{hm}:e_{10}^m}^+ [TFPI : E_5^{hm}] e_{10}^m$$

$$-k_{TFPI:e_5^{hm}:e_{10}^m}^- [E_{10}^m : TFPI : E_5^{hm}]$$

$$+k_{10}^{ont} p_{10}^{avail} - k_{10}^{offt} [E_{10}^m : TFPI : E_5^{hm}]$$

$$+k_5^{ont} [E_{10}^m : TFPI : E_5^h] p_5^{avail}$$

$$-k_5^{offt} [E_{10}^m : TFPI : E_5^{hm}]$$



$$\frac{d}{dt}[E_{10} : TFPI : E_5^h] = +k_{flow}([E_{10} : TFPI : E_5^h]^{up} - [E_{10} : TFPI : E_5^h]) \quad (101)$$

$$\begin{aligned} & +k_{TFPI:e_{10}:e_5^h}^+ [TFPI : E_{10}] e_5^h \\ & -k_{TFPI:e_{10}:e_5^h}^- [E_{10} : TFPI : E_5^h] \\ & +k_{TFPI:e_5^h:e_{10}}^+ [TFPI : E_5^h] e_{10} \\ & -k_{TFPI:e_5^h:e_{10}}^- [E_{10} : TFPI : E_5^h] \\ & -k_5^{ont} [E_{10} : TFPI : E_5^h] p_5^{avail} \\ & +k_5^{offt} [E_{10} : TFPI : E_5^{hm}] \\ & -k_{10}^{ont} [E_{10} : TFPI : E_5^h] p_{10}^{avail} \\ & +K_{10}^{offt} [E_{10}^m : TFPI : E_5^h] \end{aligned} \quad (102)$$

$$\begin{aligned} \frac{d}{dt}[E_{10} : TFPI : E_5^{hm}] & = +k_5^{ont} [E_{10} : TFPI : E_5^h] p_5^{avail} \\ & -k_5^{offt} [E_{10} : TFPI : E_5^{hm}] \\ & -k_{10}^{ont} [E_{10} : TFPI : E_5^{hm}] p_{10}^{avail} \\ & +k_{10}^{offt} [E_{10}^m : TFPI : E_5^{hm}] \\ & +k_{TFPI:e_5^{hm}:e_{10}}^+ [TFPI : E_5^{hm}] e_{10} \\ & -k_{TFPI:e_5^{hm}:e_{10}}^- [E_{10} : TFPI : E_5^{hm}] \end{aligned}$$

$$\frac{d}{dt}[E_{10}^m : TFPI : E_5^h] = +k_{10}^{ont} [E_{10} : TFPI : E_5^h] p_{10}^{avail} \quad (103)$$

$$\begin{aligned} & -k_{10}^{offt} [E_{10}^m : TFPI : E_5^h] \\ & -k_5^{ont} [E_{10}^m : TFPI : E_5^h] p_5^{avail} \\ & +k_5^{offt} [E_{10}^m : TFPI : E_5^{hm}] \\ & +k_{TFPI:e_{10}^m:e_5^h}^+ [TFPI : E_{10}^m] e_5^h \\ & -k_{TFPI:e_{10}^m:e_5^h}^- [E_{10}^m : TFPI : E_5^h] \end{aligned}$$

$$\begin{aligned} \frac{d}{dt}[PRO^h : E_2^m] & = +k_{PRO^h:e_2^m}^+ PRO^h E_2^m - k_{PRO^h:e_2^m}^- [PRO^h : E_2^m] \\ & -k_{PRO^h:e_2^m}^{cat} [PRO^h : E_2^m] \end{aligned} \quad (104)$$

$$\frac{d}{dt}[E_9 : AT] = -k_9^{on} p_9^{avail} [E_9 : AT] \quad (105)$$

$$\begin{aligned} & +k_9^{off} [E_9^m : AT] + k_{e_9}^{AT} e_9 [AT] \\ & +k_{flow}([E_9 : AT]_{up} - [E_9 : AT]) \\ & -k_9^{on} p_{91}^{avail} [E_9 : AT] + k_9^{off} [E_9^{m*} : AT] \end{aligned}$$

$$\begin{aligned} \frac{d}{dt}[E_9^m : AT] & = +k_{e_9^m}^{AT} e_9^m [AT] \\ & -k_9^{off} [E_9^m : AT] + k_9^{on} p_9^{avail} [E_9 : AT] \end{aligned} \quad (106)$$

$$\begin{aligned} \frac{d}{dt}[E_9^{m*} : AT] & = +k_{e_9^m}^{AT} e_9^{m*} [AT] \\ & -k_9^{off} [E_9^{m*} : AT] + k_9^{on} p_{91}^{avail} [E_9 : AT] \end{aligned} \quad (107)$$

$$\begin{aligned} \frac{d}{dt}[E_{10} : AT] & = +k_{e_{10}}^{AT} e_{10} [AT] \\ & +k_{flow}([E_{10} : AT]_{up} - [E_{10} : AT]) \\ & +k_{10}^{off} [E_{10}^m : AT] - k_{10}^{on} p_{10}^{avail} [E_{10} : AT] \end{aligned} \quad (108)$$

$$\frac{d}{dt}[E_{10}^m : AT] = +k_{e_{10}}^{AT} e_{10}^m [AT] - k_{10}^{off} [E_{10}^m : AT] + k_{10}^{on} p_{10}^{avail} [E_{10} : AT] \quad (109)$$

$$\frac{d}{dt}[E_2 : AT] = +k_{e_2}^{off} [E_2^m : AT] - k_{e_2}^{on} p_2^{avail} [E_2 : AT] + k_{e_2}^{AT} e_2 + k_{flow}([E_2 : AT]_{up} - [E_2 : AT]) \quad (110)$$

$$\frac{d}{dt}[E_2^m : AT] = +k_{e_2}^{AT} e_2^m [AT] - k_{e_2}^{off} [E_2^m : AT] + k_{e_2}^{on} p_2^{avail} [E_2 : AT] \quad (111)$$

$$\begin{aligned} \frac{d}{dt}[E_{11} : AT] = & +k_{e_{11}}^{AT} e_{11} [AT] - k_{e_{11}}^{AT} [E_{11} : AT][AT] \\ & +k_{11}^{off} [E_{11}^{m*} : AT] - k_{11}^{on} p_{111}^{avail} [E_{11} : AT] \\ & +k_{e_{11}}^{ATH} e_{11} [AT : Hep] - k_{e_{11}}^{ATH} [E_{11} : ATH][AT : Hep] \\ & +k_{flow}([E_{11} : ATH]_{up} - [E_{11} : ATH]) \\ & -k_{e_{11}}^{on} p_{111}^{avail} [E_{11} : ATH] + k_{e_{11}}^{off} [E_{11}^{m*} : ATH] \end{aligned} \quad (112)$$

$$\frac{d}{dt}[AT : E_{11} : AT] = +k_{e_{11}}^{AT} [E_{11} : AT][AT] \quad (113)$$

$$\begin{aligned} \frac{d}{dt}[E_{11}^{m*} : AT] = & +k_{e_{11}}^{AT} e_{11}^{m*} [AT] - k_{11}^{off} [E_{11}^{m*} : AT] + k_{11}^{on} p_{111}^{avail} [E_{11} : AT] \end{aligned} \quad (114)$$

$$\begin{aligned} \frac{d}{dt}[E_{11}^h : AT] = & +k_{e_{11}}^{AT} e_{11}^h [AT] + k_{11}^{off} [E_{11}^{hm} : AT] - k_{11}^{on} p_{11}^{avail} [E_{11}^h : AT] \end{aligned} \quad (115)$$

$$\begin{aligned} \frac{d}{dt}[E_{11}^{hm} : AT] = & +k_{e_{11}}^{AT} e_{11}^{hm} [AT] - k_{11}^{off} [E_{11}^{hm} : AT] + k_{11}^{on} p_{11}^{avail} [E_{11}^h : AT] \end{aligned} \quad (116)$$

$$\begin{aligned} \frac{d}{dt}[AT] = & -k_{e_9}^{AT} e_9 [AT] - k_{e_9}^{AT} e_9^m [AT] + k_{e_9}^{AT} e_9^{m*} [AT] \\ & -k_{e_{10}}^{AT} e_{10} [AT] + k_{e_{10}}^{m AT} e_{10}^m [AT] - k_{e_2}^{AT} e_2 [AT] - k_{e_2}^{AT} e_2^m [AT] \\ & -k_{e_{11}}^{AT} e_{11} [AT] - k_{e_{11}}^{AT} [E_{11} : AT][AT] - k_{e_{11}}^{AT} e_{11}^{m*} [AT] - k_{e_{11}}^{AT} e_{11}^h [AT] \\ & -k_{e_{11}}^{AT} e_{11}^h [AT] + k_{flow}([AT]_{up} - [AT]) \\ & -k_{[AT:Hep]}^+ [Hep][AT] + k_{[AT:Hep]}^- [AT : Hep] \end{aligned} \quad (117)$$

$$\frac{d}{dt}[Hep] = -k_{[AT:Hep]}^+ [Hep][AT] + k_{[AT:Hep]}^- [AT : Hep] \quad (118)$$

$$\frac{d}{dt}[AT : Hep] = +k_{[AT:Hep]}^+[Hep][AT] - k_{[AT:Hep]}^-[AT : Hep] \quad (119)$$

$$\begin{aligned} & -k_{e_{10}}^{ATH} e_{10}[AT : Hep] - k_{e_{10}^m}^{ATH} e_{10}^m[AT : Hep] \\ & -k_{e_2}^{ATH} e_2[AT : Hep] - k_{e_2^m}^{ATH} e_2^m[AT : Hep] \\ & -k_{e_9}^{ATH} e_9[AT : Hep] - k_{e_9^m}^{ATH} e_9^m[AT : Hep] \\ & -k_{e_9^m}^{ATH} e_9^{m*}[AT : Hep] \\ & -k_{e_{11}}^{ATH} e_{11}[AT : Hep] - k_{e_{11}}^{ATH} [E_{11} : ATH][AT : Hep] \\ & -k_{e_{11}}^{ATH} e_{11}^{m*}[AT : Hep] - k_{e_{11}}^{ATH} e_{11}^h[AT : Hep] \\ & -k_{e_{11}}^{ATH} e_{11}^{hm}[AT : Hep] \end{aligned}$$

$$\frac{d}{dt}[E_{10} : ATH] = +k_{e_{10}}^{ATH} e_{10}[AT : Hep] + k_{flow}([E_{10} : ATH]_{up} - [E_{10} : ATH]) \quad (120)$$

$$-k_{10}^{on} p_{10}^{avail} [E_{10} : ATH] + k_{10}^{off} [E_{10}^m : ATH]$$

$$\frac{d}{dt}[E_{10}^m : ATH] = +k_{e_{10}}^{ATH} e_{10}^m[AT : Hep] \quad (121)$$

$$+k_{10}^{on} p_{10}^{avail} [E_{10} : ATH] - k_{10}^{off} [E_{10}^m : ATH]$$

$$\frac{d}{dt}[E_2 : ATH] = +k_{e_2}^{ATH} e_2[AT : Hep] + k_{flow}([E_2 : ATH]_{up} - [E_2 : ATH]) \quad (122)$$

$$-k_{e_2}^{on} p_2^{avail} [E_2 : ATH] + k_{e_2}^{off} [E_2^m : ATH]$$

$$\frac{d}{dt}[E_2^m : ATH] = +k_{e_2}^{ATH} e_2^m[AT : Hep] \quad (123)$$

$$+k_{e_2}^{on} p_2^{avail} [E_2 : ATH] - k_{e_2}^{off} [E_2^m : ATH]$$

$$\frac{d}{dt}[E_9 : ATH] = +k_{e_9}^{ATH} e_9[AT : Hep] + k_{flow}([E_9 : ATH]_{up} - [E_9 : ATH]) \quad (124)$$

$$-k_{e_9}^{on} p_9^{avail} [E_9 : ATH] + k_{e_9}^{off} [E_9^m : ATH]$$

$$-k_{e_9}^{on} p_{91}^{avail} [E_9 : ATH] + k_{e_9}^{off} [E_9^{m*} : ATH]$$

$$\frac{d}{dt}[E_9^{m*} : ATH] = +k_{e_9}^{ATH} e_9^m[AT : Hep] \quad (125)$$

$$+k_{e_9}^{on} p_9^{avail} [E_9 : ATH] - k_{e_9}^{off} [E_9^m : ATH]$$

$$\frac{d}{dt}[E_9^{m*} : ATH] = +k_{e_9^{m*}:ATH} e_9^{m*}[AT : Hep] \quad (126)$$

$$+k_{e_9}^{on} p_{91}^{avail} [E_9 : ATH] - k_{e_9}^{off} [E_9^{m*} : ATH]$$

$$\frac{d}{dt}[ATH : E_{11} : ATH] = +k_{e_{11}}^{ATH} [AT : Hep][E_{11} : ATH] \quad (127)$$

$$+k_{flow}([ATH : E_{11} : ATH]_{up} - [ATH : E_{11} : ATH])$$

$$\frac{d}{dt}[E_{11}^{m*} : ATH] = +k_{e_{11}}^{ATH} e_{11}^{m*}[AT : Hep] + k_{e_{11}}^{on} p_{111}^{avail} [E_{11} : ATH] \quad (128)$$

$$-k_{e_{11}}^{off} [E_{11}^{m*} : ATH]$$

$$\frac{d}{dt}[E_{11}^h : ATH] = +k_{e_{11}}^{ATH} e_{11}^h[AT : Hep] \quad (129)$$

$$+k_{flow}([E_{11}^h : ATH]_{up} - [E_{11}^h : ATH])$$

$$+k_{e_{11}}^{off} [E_{11}^{hm} : ATH] - k_{e_{11}}^{on} p_{111}^{avail} [E_{11}^h : ATH]$$

$$\frac{d}{dt}[E_{11}^{hm} : ATH] = +k_{e_{11}}^{ATH} e_{11}^{hm}[AT : Hep] \quad (130)$$

$$-k_{11}^{off} [E_{11}^{hm} : ATH]$$

$$+k_{11}^{on} p_{111}^{avail} [E_{11}^h : ATH]$$

**S1 Table. INITIAL PLASMA LEVELS.** Descriptions, notation and labels for each parameter associated with initial plasma levels are listed. The value of each parameter is found in the corresponding table listed above.

| Description | Notation | Label    | Table |
|-------------|----------|----------|-------|
| Prothrombin | $z_2$    | $Z_2$    | S8    |
| Factor V    | $z_5$    | $Z_5$    | S8    |
| Factor VII  | $z_7$    | $Z_7$    | S8    |
| Factor VIII | $z_8$    | $Z_8$    | S8    |
| Factor IX   | $z_9$    | $Z_9$    | S8    |
| Factor X    | $z_{10}$ | $Z_{10}$ | S8    |
| Factor XI   | $z_{11}$ | $Z_{11}$ | S8    |
| TFPI        | [TFPI]   | TFPI     | S8    |
| AT          | [AT]     | AT       | S8    |
| Hep         | [Hep]    | Hep      | S8    |

**S2 Table. PLATELET CHARACTERISTICS.** Descriptions, notation and labels for each parameter associated with platelet characteristics are listed. The value of each parameter is found in the corresponding table listed above.

| Description                                         | Notation          | Label                | Table |
|-----------------------------------------------------|-------------------|----------------------|-------|
| Platelet count                                      | $PL^{up}$         | PLup                 | S8    |
| Binding site number for II                          | $N_2$             | N2                   | S8    |
| Binding site number for IIa                         | $N_2^*$           | N2*                  | S8    |
| Binding site number for V/Vh/Va                     | $N_5$             | N5                   | S8    |
| Binding site number for VIII/VIIIa                  | $N_8$             | N8                   | S8    |
| Binding site number for IX                          | $N_9$             | N9                   | S8    |
| Binding site number for IXa                         | $N_9^*$           | N9*                  | S8    |
| Binding site number for X/Xa                        | $N_{10}$          | N10                  | S8    |
| Binding site number for XI                          | $N_{11}$          | N11                  | S8    |
| Binding site number for XIa                         | $N_{11}^*$        | N11*                 | S8    |
| Rate of unactivated platelets adhering to SE        | $k_{adh}^{+11}$   | kadh                 | S14   |
| Rate of activated platelets adhering to SE          | $k_{adh}^{+,*}$   | kadh1                | S14   |
| Rate of platelet activation by platelet in solution | $k_{plt}^{act}$   | kact <sub>plt</sub>  | S14   |
| Rate of platelet activation on SE                   | $k_{plt}^{act,*}$ | kact* <sub>plt</sub> | S14   |
| Rate of platelet activation by thrombin             | $k_{e2}^{act}$    | kact <sub>e2</sub>   | S14   |

**S3 Table. KINETIC RATE CONSTANTS.** Descriptions, notation and labels for each parameter associated with kinetic rate constants are listed. The value of each parameter is found in the corresponding table listed above.

| Description                                      | Notation                       | Label           | Table |
|--------------------------------------------------|--------------------------------|-----------------|-------|
| Rates of activation of TF:VII by fX              | $K_M$                          | KZ7mE10M        | S9    |
|                                                  | $k_{z_7^m:e_{10}}^{cat}$       | KZ7mE10CAT      | S9    |
| Rates of activation of fX by TF:VIIa             | $k_{z_7^m:e_{10}}^-$           | KZ7mE10MI       | S9    |
|                                                  | $K_M$                          | KZ10E7mM        | S9    |
|                                                  | $k_{z_{10}^m:e_7^m}^{cat}$     | KZ10E7mCAT      | S9    |
| Rates of activation of fIX by TF:VIIa            | $k_{z_{10}^m:e_7^m}^-$         | KZ10E7mMI       | S9    |
|                                                  | $K_M$                          | KZ9E7mM         | S9    |
|                                                  | $k_{z_9^m:e_7^m}^{cat}$        | KZ9E7mCAT       | S9    |
| Rates of activation of fIX by TF:VIIa            | $k_{z_9^m:e_7^m}^-$            | KZ9E7mMI        | S9    |
|                                                  | $k_7^{on}$                     | K7ON            | S9    |
|                                                  | $k_7^{off}$                    | K7OFF           | S10   |
| Rates of activation of TF:VII by fXa             | $K_M$                          | KZ7E10M         | S10   |
|                                                  | $k_{z_7^m:e_{10}^m}^{cat}$     | KZ7E10CAT       | S10   |
|                                                  | $k_{z_7^m:e_{10}^m}^-$         | KZ7E10MI        | S10   |
| Rates of activation of TF:VII by fIIa            | $K_M$                          | KZ7E2M          | S10   |
|                                                  | $k_{z_7^m:e_2}^{cat}$          | KZ7E2CAT        | S10   |
|                                                  | $k_{z_7^m:e_2}^-$              | KZ7E2MI         | S10   |
| Rates of activation of TF:VII by fIXa            | $K_M$                          | KZ7E9M          | S10   |
|                                                  | $k_{z_7^m:e_9}^{cat}$          | KZ7E9CAT        | S10   |
|                                                  | $k_{z_7^m:e_9}^-$              | KZ7E9MI         | S10   |
| Rates of activation of fV by fIIa                | $K_M$                          | KZ5E2M          | S10   |
|                                                  | $k_{z_5^m:e_2}^{cat}$          | KZ5E2CAT        | S10   |
|                                                  | $k_{z_5^m:e_2}^-$              | KZ5E2MI         | S10   |
| Rates of activation of fVIII by fIIa             | $K_M$                          | KZ8E2M          | S10   |
|                                                  | $k_{z_8^m:e_2}^{cat}$          | KZ8E2CAT        | S10   |
|                                                  | $k_{z_8^m:e_2}^-$              | KZ8E2MI         | S10   |
| Rates of activation of fIX by fXIa-fXIa          | $k_{z_9^m:e_{11}}^+$           | KZ9E11P         | S10   |
|                                                  | $k_{z_9^m:e_{11}}^{cat}$       | KZ9E11CAT       | S10   |
|                                                  | $k_{z_9^m:e_{11}}^-$           | KZ9E11MI        | S10   |
| Rates of activation of fIX by fXIa-fXI           | $k_{z_9^m:e_{11}}^+$           | KZ9E11P         | S10   |
|                                                  | $k_{z_9^m:e_{11}}^{cat}$       | KZ9E11CAT       | S10   |
|                                                  | $k_{z_9^m:e_{11}}^-$           | KZ9E11MI        | S10   |
| Rates of activation of fXI by fIIa               | $k_{z_{11}^m:e_2}^+$           | KZ11E2P         | S10   |
|                                                  | $k_{z_{11}^m:e_2}^{cat}$       | KZ11E2CAT       | S10   |
|                                                  | $k_{z_{11}^m:e_2}^-$           | KZ11E2MI        | S11   |
| Rates of binding of fX/fXa to plt. surface       | $k_{10}^{on}$                  | K10ON           | S11   |
| Rates of binding of fV/fVa to plt. surface       | $k_{10}^{off}$                 | K10OFF          | S11   |
|                                                  | $k_5^{on}$                     | K5ON            | S11   |
| Rates of binding of fVIII/fVIIIa to plt. surface | $k_5^{off}$                    | K5OFF           | S1    |
|                                                  | $k_8^{on}$                     | K8ON            | S1    |
| Rates of binding of fIX/fIXa to plt. surface     | $k_8^{off}$                    | K8OFF           | S1    |
|                                                  | $k_9^{on}$                     | K9ON            | S1    |
| Rates of binding of fII/fIIa to plt. surface     | $k_9^{off}$                    | K9OFF           | S11   |
|                                                  | $k_2^{on}, k_2^{on,*}$         | K2ON, K2SON     | S1    |
| Rates of binding of fXI/fXIa to plt. surface     | $k_2^{off}, k_2^{off,*}$       | K2OFF, K2SOFF   | S11   |
|                                                  | $k_{11}^{on}, k_{11}^{on,*}$   | K11ON, K11SON   | S11   |
|                                                  | $k_{11}^{off}, k_{11}^{off,*}$ | K11OFF, K11SOFF | S12   |

**S4 Table. KINETIC RATE CONSTANTS.** Descriptions, notation and labels for each parameter associated with kinetic rate constants are listed. The value of each parameter is found in the corresponding table listed above.

| Description                                             | Notation                   | Label        | Table |
|---------------------------------------------------------|----------------------------|--------------|-------|
| Rates of activation of fV by fXa on plt. surface        | $K_M$                      | KZ5mE10mM    | S12   |
|                                                         | $k_{z_5^m:e_{10}^m}^{cat}$ | KZ5mE10mCAT  | S12   |
| Rates of activation of fV by fIIa on plt. surface       | $k_{z_5^m:e_{10}^m}^-$     | KZ5mE10mMI   | S12   |
|                                                         | $K_M$                      | KZ5mE2mM     | S12   |
| Rates of activation of fV by fIIa on plt. surface       | $k_{z_5:e_2}^{cat}$        | KZ5mE2mCAT   | S12   |
|                                                         | $k_{z_5:e_2}^-$            | KZ5mE2mMI    | S12   |
| Rates of activation of fVIII by fXa on plt. surface     | $K_M$                      | KZ8ME10MM    | S12   |
|                                                         | $k_{z_8:e_{10}^m}^{cat}$   | KZ8ME10MCAT  | S12   |
| Rates of activation of fVIII by fXa on plt. surface     | $k_{z_8:e_{10}^m}^-$       | KZ8ME10MMI   | S12   |
|                                                         | $K_M$                      | KZ8ME2MM     | S12   |
| Rates of activation of fVIII by fIIa on plt. surface    | $k_{z_8:e_2}^{cat}$        | KZ8mE2mCAT   | S12   |
|                                                         | $k_{z_8:e_2}^-$            | KZ8mE2mMI    | S12   |
| Rates of activation of fX by TEN on plt. surface        | $K_M$                      | KZ10mTENM    | S12   |
|                                                         | $k_{z_{10}^m:TEN}^{cat}$   | KZ10mTENCAT  | S12   |
| Rates of activation of fII by PRO on plt. surface       | $K_M$                      | KZ2mPROM     | S12   |
|                                                         | $k_{z_2^m:PRO}^{cat}$      | KZ2mPROCAT   | S12   |
| Rates of activation of fXI by fIIa on plt. surfaces     | $k_{z_{11}^m:e_2^m}^+$     | KZ11mE2mP    | S12   |
|                                                         | $k_{z_{11}^m:e_2^m}^{cat}$ | KZ11mE2mCAT  | S12   |
| Rates of activation of fXI by fIIa on plt. surfaces     | $k_{z_{11}^m:e_2^m}^-$     | KZ11mE2mMI   | S12   |
|                                                         | $K_M$                      | KZ9mE11mP    | S12   |
| Rates of activation of fIX by fXIa-fXIa on plt. surface | $k_{z_9^m:e_{11}^m}^{cat}$ | KZ9mE11mCAT  | S12   |
|                                                         | $k_{z_9^m:e_{11}^m}^-$     | KZ9mE11mMI   | S12   |
| Rates of formation of TEN on plt. surface               | $k_{e_8^m:e_9^m}^+$        | KE8mE9mP     | S12   |
|                                                         | $k_{e_8^m:e_9^m}^-$        | KE8mE9mMI    | S12   |
| Rates of formation of PRO on plt. surface               | $k_{e_5^m:e_{10}^m}^+$     | KE5mE10mP    | S12   |
|                                                         | $k_{e_5^m:e_{10}^m}^-$     | KE5mE10mMI   | S12   |
| Rates of inhibition of fXa by TFPI                      | $k_{tfpia:e_{10}}^+$       | KTFPI_E10_P  | S13   |
|                                                         | $k_{tfpia:e_{10}}^-$       | KTFPI_E10_M  | S13   |
| Rates of inhibition of TF:VIIa by TFPIa                 | $k_{tfpia:e_7^m}^+$        | KTFPIa_E7m_P | S13   |
|                                                         | $k_{tfpia:e_7^m}^-$        | KTFPIa_E7m_M | S13   |
| Rates of inhibition of fVa by APC on plt. surface       | $K_M$                      | KE5mAPCM     | S13   |
|                                                         | $k_{e_5^m:APC}^{cat}$      | KE5mAPCCAT   | S13   |
| Rates of inhibition of fVIIIa by APC on plt. surface    | $k_{e_5^m:APC}^-$          | KE5mAPCMI    | S13   |
|                                                         | $K_M$                      | KE8mAPCM     | S13   |
| Rates of inhibition of fVIIIa by APC on plt. surface    | $k_{e_8^m:APC}^{cat}$      | KE8mAPCCAT   | S13   |
|                                                         | $k_{e_8^m:APC}^-$          | KE8mAPCMI    | S13   |
| Rates of inhibition of fIIa by TM on plt. surface       | $k_{TM}^{on}$              | KTMP         | S13   |
|                                                         | $k_{TM}^{off}$             | KTMM         | S14   |

**S5 Table. NEW KINETIC RATE CONSTANTS ADDED IN TFPI EXTENSION.** Descriptions, notation and labels for each parameter associated with kinetic rate constants are listed. The value of each parameter is found in the corresponding table listed above.

| Description                                                      | Notation               | Label          | Table |
|------------------------------------------------------------------|------------------------|----------------|-------|
| Rates of binding of fV-h by fXa on plt. surface                  | $k_{e5hme10m}^+$       | KE5HME10MP     | S10   |
|                                                                  | $k_{e5^m:e10}^-$       | KE5HME10MMI    | S12   |
| Rates of activation of II by PROh on plt. surface                | $K_M$                  | KZ2MPROHM      | S10   |
|                                                                  | $k_{z2^m:PROh}^{cat}$  | KZ2MPROHCAT    | S12   |
|                                                                  | $k_{z2^m:PROh}^-$      | KZ2MPROHMI     | S12   |
| Rates of activation of fV-h by IIa on plt. surface               | $K_M$                  | KE5HME2MM      | S10   |
|                                                                  | $k_{e5^hm:e2}^{cat}$   | KE5HME2MCAT    | S12   |
|                                                                  | $k_{e5^hm:e2}^-$       | KE5HME2MMI     | S12   |
| Rates of activation of fV-h by IIa in fluid                      | $K_M$                  | KE5HE2M        | S10   |
|                                                                  | $k_{e5^h:e2}^{cat}$    | KE5HE2CAT      | S12   |
|                                                                  | $k_{e5^h:e2}^-$        | KE5HE2MI       | S12   |
| Rates of binding of fV-h by TFPI on plt. surface                 | $k_{TFPI:e5^hm}^+$     | KTFPIE5HMP     | S10   |
|                                                                  | $k_{TFPI:e5^hm}^-$     | KTFPIE5HMMI    | S13   |
| Rates of binding of fV-h by TFPI in fluid                        | $k_{TFPI:e5^h}^+$      | KTFPIE5HP      | S10   |
|                                                                  | $k_{TFPI:e5^h}^-$      | KTFPIE5HMI     | S13   |
| Rates of binding of fXa by TFPI on plt. surface                  | $k_{TFPI:e10}^+$       | KTFPI_E10M_P   | S10   |
|                                                                  | $k_{TFPI:e10}^-$       | KTFPI_E10M_MI  | S13   |
| Rates of binding of PROh by TFPI on plt. surface by binding fXa  | $k_{TFPI:PRO^h:v10}^+$ | KTFPIPROHV10P  | S10   |
|                                                                  | $k_{TFPI:PRO^h:v10}^-$ | KTFPIPROHV10MI | S13   |
| Rates of binding of PROh by TFPI on plt. surface by binding fV-h | $k_{TFPI:PRO^h:v5}^+$  | KTFPIPROHV5P   | S10   |
|                                                                  | $k_{TFPI:PRO^h:v5}^-$  | KTFPIPROHV5MI  | S13   |
| Rates of inactivation of fV-h by APC on plt. surface             | $K_M$                  | KE5HMAPCM      | S10   |
|                                                                  | $k_{e5^hm}^{cat}$      | KE5HMAPCCAT    | S13   |
|                                                                  | $k_{e5^hm:APC}^-$      | KE5HMAPCMI     | S13   |
| Rates of inactivation of fV-h by APC in fluid                    | $K_M$                  | KE5HAPCM       | S10   |
|                                                                  | $k_{e5^h}^{cat}$       | KE5HAPCCAT     | S13   |
|                                                                  | $k_{e5^h:APC}^-$       | KE5HAPCMI      | S13   |

**S6 Table. NEW KINETIC RATE CONSTANTS ADDED IN AT EXTENSION.** Descriptions, notation and labels for each parameter associated with kinetic rate constants are listed. The value of each parameter is found in the corresponding table listed above.

| Description                                          | Notation           | Label      | Table |
|------------------------------------------------------|--------------------|------------|-------|
| Rates of inactivation of fIXa by AT on plt. surface  | $k_{e_9}^{AT}$     | KE9MATIII  | S13   |
| Rates of inactivation of fXa by AT on plt. surface   | $k_{e_9}^{AT}$     | KE10MATIII | S13   |
| Rates of inactivation of IIa by AT on plt. surface   | $k_{e_2}^{AT}$     | KE2MATIII  | S13   |
| Rates of inactivation of fXIa by AT on plt. surface  | $k_{e_{11}}^{AT}$  | KE11MATIII | S13   |
| Rates of inactivation of fIXa by AT in fluid         | $k_{e_9}^{AT}$     | KE9ATIII   | S13   |
| Rates of inactivation of fXa by AT in fluid          | $k_{e_{10}}^{AT}$  | KE10ATIII  | S13   |
| Rates of inactivation of IIa by AT in fluid          | $k_{e_2}^{AT}$     | KE2ATIII   | S13   |
| Rates of inactivation of fXIa by AT in fluid         | $k_{e_{11}}^{AT}$  | KE11ATIII  | S13   |
| Rates of binding of AT by Heparin on plt. surface    | $k_{AT:Hep}^+$     | KATBHEPPI  | S13   |
|                                                      | $k_{AT:Hep}^-$     | KATBHEPPI  | S13   |
| Rates of inactivation of fIXa by ATH on plt. surface | $k_{e_9}^{ATH}$    | KE9MATH    | S13   |
| Rates of inactivation of fXa by ATH on plt. surface  | $k_{e_9}^{ATH}$    | KE10MATH   | S13   |
| Rates of inactivation of IIa by ATH on plt. surface  | $k_{e_2}^{ATH}$    | KE2MATH    | S13   |
| Rates of inactivation of fXIa by AT on plt. surface  | $k_{e_{11}}^{ATH}$ | KE11MATH   | S13   |
| Rates of inactivation of fIXa by ATH in fluid        | $k_{e_9}^{ATH}$    | KE9ATH     | S13   |
| Rates of inactivation of fXa by ATH in fluid         | $k_{e_{10}}^{ATH}$ | KE10ATH    | S13   |
| Rates of inactivation of IIa by ATH in fluid         | $k_{e_2}^{ATH}$    | KE2ATH     | S13   |
| Rates of inactivation of fXIa by AT in fluid         | $k_{e_{11}}^{ATH}$ | KE11ATH    | S13   |



**Kinetic and Physical Parameter Values:**

**S7 Table. DIFFUSION COEFFICIENTS FOR PLATELETS AND FLUID-PHASE CHEMICAL SPECIES** (a) From (4). (b) From (5).

|           |                                            |   |
|-----------|--------------------------------------------|---|
| Platelets | $2.5 \times 10^{-7} \text{ cm}^2/\text{s}$ | a |
| Proteins  | $5 \times 10^{-7} \text{ cm}^2/\text{s}$   | b |

**S8 Table. NORMAL CONCENTRATIONS AND SURFACE BINDING SITE NUMBERS** (a) From (6). (b) From (7). (c) (8) suggests that normal plasma concentration of fVIIa is about 1% of the normal fVII concentration. (d) From (9). (e) (f) From (10). (g) Estimated as described in the text of the Supplementary Information. (h) From (11). (i) From (12). (j) From (13). (k) From (14). (l) From (15, 16). (m) Number of fV molecules released per activated platelet (17). (n) Maximum concentration of platelets in a  $2 \mu\text{m}$  high reaction zone assuming that 20 platelets can cover a  $10 \mu\text{m}$ -by- $10 \mu\text{m}$  injured surface (18). (o) From (19). (p) Refer to heparin dosage calculation in later section of supplemental material.

|                |                         |   |
|----------------|-------------------------|---|
| Prothrombin    | $1.4 \mu\text{M}$       | a |
| Factor V       | $0.01 \mu\text{M}$      | b |
| Factor VII     | $0.01 \mu\text{M}$      | a |
| Factor VIIa    | $0.1 \text{ nM}$        | c |
| Factor VIII    | $1.0 \text{ nM}$        | a |
| Factor IX      | $0.09 \mu\text{M}$      | a |
| Factor X       | $0.17 \mu\text{M}$      | a |
| Factor XI      | $30.0 \text{ nM}$       | a |
| TFPI           | $0.5 \text{ nM}$        | d |
| Protein C      | $65 \text{ nM}$         | e |
| Platelet count | $2.5(10)^5/\mu\text{l}$ | f |
| $N_2$          | $1000/\text{plt}$       | g |
| $N_2^*$        | $1000/\text{plt}$       | g |
| $N_5$          | $3000/\text{plt}$       | h |
| $N_8$          | $450/\text{plt}$        | i |
| $N_9$          | $250/\text{plt}$        | j |
| $N_9^*$        | $250/\text{plt}$        | j |
| $N_{10}$       | $2700/\text{plt}$       | k |
| $N_{11}$       | $1500/\text{plt}$       | l |
| $N_{11}^*$     | $250/\text{plt}$        | l |
| $n_5$          | $3000/\text{plt}$       | m |
| $pPLAS$        | $0.167 \text{ nM}$      | n |
| $AT$           | $2.4 \text{ nM}$        | o |
| $LMWH$         | $253 \text{ nM}$        | p |
| $UFH$          | $759 \text{ nM}$        | p |

**S9 Table. REACTIONS ON SUBENDOTHELIUM** (a)  $k_{z_7^m:e_{10}}^{\text{cat}} = 5.0 \text{ sec}^{-1}$  and  $K_M = 1.2 \cdot 10^{-6} \text{ M}$  (20). (b)  $k_{z_7^m:e_2}^{\text{cat}} = 6.1 \cdot 10^{-2} \text{ sec}^{-1}$  and  $K_M = 2.7 \cdot 10^{-6} \text{ M}$  (20). (d)  $k_{z_{10}:e_7^m}^{\text{cat}} = 1.15 \text{ sec}^{-1}$  and  $K_M = 4.5 \cdot 10^{-7} \text{ M}$  (6). (d)  $k_{z_9:e_7^m}^{\text{cat}} = 1.15 \text{ sec}^{-1}$  and  $K_M = 2.4 \cdot 10^{-7} \text{ M}$  (21). (e)  $K_d = 1.0 \cdot 10^{-10} \text{ M}$  (22).

|                            |                 |                  |          |                                       |                                        |                                                  |   |
|----------------------------|-----------------|------------------|----------|---------------------------------------|----------------------------------------|--------------------------------------------------|---|
| Activation<br>(of -, by -) |                 |                  |          |                                       |                                        |                                                  |   |
| (TF:VII,fXa)               | $E_{10}, Z_7^m$ | $Z_7^m : E_{10}$ | $E_7^m$  | $k_{z_7^m:e_{10}}^+ = 5.0 \cdot 10^6$ | $k_{z_7^m:e_{10}}^- = 1.0$             | $k_{z_7^m:e_{10}}^{\text{cat}} = 5.0$            | a |
| (TF:VII, fIIa)             | $E_2, Z_7^m$    | $Z_7^m : E_2$    | $E_7^m$  | $k_{z_7^m:e_2}^+ = 3.92 \cdot 10^5$   | $k_{z_7^m:e_2}^- = 1.0$                | $k_{z_7^m:e_2}^{\text{cat}} = 6.1 \cdot 10^{-2}$ | b |
| (fX, TF:VIIa)              | $E_7^m, Z_{10}$ | $Z_{10} : E_7^m$ | $E_{10}$ | $k_{z_{10}:e_7^m}^+ = 5.0 \cdot 10^6$ | $k_{z_{10}:e_7^m}^- = 1.0$             | $k_{z_{10}:e_7^m}^{\text{cat}} = 1.15$           | c |
| (fIX, TF:VIIa)             | $E_7^m, Z_9$    | $Z_9 : E_7^m$    | $E_9$    | $k_{z_9:e_7^m}^+ = 9.4 \cdot 10^6$    | $k_{z_9:e_7^m}^- = 1.0$                | $k_{z_9:e_7^m}^{\text{cat}} = 1.15$              | d |
| Binding<br>(of -, with -)  |                 |                  |          |                                       |                                        |                                                  |   |
| (fVII, TF)                 | $Z_7, TF$       |                  | $Z_7^m$  | $k_7^{\text{on}} = 5.0 \cdot 10^7$    | $k_7^{\text{off}} = 5.0 \cdot 10^{-3}$ |                                                  | e |
| (fVIIa, TF)                | $E_7, TF$       |                  | $E_7^m$  | $k_7^{\text{on}} = 5.0 \cdot 10^7$    | $k_7^{\text{off}} = 5.0 \cdot 10^{-3}$ |                                                  | e |

**S10 Table. REACTIONS IN THE PLASMA** (a)  $k_{z_7:e_{10}}^{\text{cat}} = 5.0 \text{ sec}^{-1}$  and  $K_M = 1.2 \cdot 10^{-6} \text{ M}$  (20). (b)  $k_{z_7:e_2}^{\text{cat}} = 6.1 \cdot 10^{-2} \text{ sec}^{-1}$  and  $K_M = 2.7 \cdot 10^{-6} \text{ M}$  (20) (c)  $k_{z_5:e_2}^{\text{cat}} = 0.23 \text{ sec}^{-1}$  and  $K_M = 7.17 \cdot 10^{-8} \text{ M}$  (23). (d)  $k_{z_8:e_2}^{\text{cat}} = 0.9 \text{ sec}^{-1}$  (24) and  $K_M = 2 \cdot 10^{-7} \text{ M}$  (25). (e)  $k_{z_{11}:e_2}^{\text{cat}} = 1.3 \cdot 10^{-4}$ ,  $K_M = 50 \text{ nM}$  (26). Rate constants apply also for thrombin-activation of XIa-XI. (f)  $k_{z_9:e_{11}^h}^{\text{cat}} = 0.21$ ,  $K_M = 0.2 \mu\text{M}$  (27, 28). Rate constants apply also for activation of IX by XIa-XIa.

| Reaction                   | Reactants       | Complex          | Product    | $\text{M}^{-1}\text{sec}^{-1}$          | $\text{sec}^{-1}$          | $\text{sec}^{-1}$                                 | Note |
|----------------------------|-----------------|------------------|------------|-----------------------------------------|----------------------------|---------------------------------------------------|------|
| Activation<br>(of -, by -) |                 |                  |            |                                         |                            |                                                   |      |
| (fVII, fXa)                | $Z_7, E_{10}$   | $Z_7 : E_{10}$   | $E_7$      | $k_{z_7:e_{10}}^+ = 5 \cdot 10^6$       | $k_{z_7:e_{10}}^- = 1.0$   | $k_{z_7:e_{10}}^{\text{cat}} = 5.0$               | a    |
| (fVII, fIIa)               | $Z_7, E_2$      | $Z_7 : E_2$      | $E_7$      | $k_{z_7:e_2}^+ = 3.92 \cdot 10^5$       | $k_{z_7:e_2}^- = 1.0$      | $k_{z_7:e_2}^{\text{cat}} = 6.1 \cdot 10^{-2}$    | b    |
| (fV, fIIa)                 | $Z_5, E_2$      | $Z_5 : E_2$      | $E_5$      | $k_{z_5:e_2}^+ = 1.73 \cdot 10^7$       | $k_{z_5:e_2}^- = 1.0$      | $k_{z_5:e_2}^{\text{cat}} = 0.23$                 | c    |
| (fVIII, fIIa)              | $Z_8, E_2$      | $Z_8 : E_2$      | $E_8$      | $k_{z_8:e_2}^+ = 2.64 \cdot 10^7$       | $k_{z_8:e_2}^- = 1.0$      | $k_{z_8:e_2}^{\text{cat}} = 0.9$                  | d    |
| (fXI-fXI, fIIa)            | $Z_{11}, E_2$   | $Z_{11} : E_2$   | $E_{11}^h$ | $k_{z_{11}:e_2}^+ = 2.0 \cdot 10^7$     | $k_{z_{11}:e_2}^- = 1.0$   | $k_{z_{11}:e_2}^{\text{cat}} = 1.3 \cdot 10^{-4}$ | e    |
| (fIX, fXIa)                | $Z_9, E_{11}^h$ | $Z_9 : E_{11}^h$ | $E_9$      | $k_{z_9:e_{11}^h}^+ = 0.6 \cdot (10)^7$ | $k_{z_9:e_{11}^h}^- = 1.0$ | $k_{z_9:e_{11}^h}^{\text{cat}} = 0.21$            | f    |

**S11 Table. BINDING TO PLATELET SURFACES** (a) For fIX binding to platelets,  $K_d = 2.5 \cdot 10^{-9}$  M (13), and for fX binding to platelets,  $K_d$  has approximately the same value (11). For fX binding to PCPS vesicles, the on-rate is about  $10^7$  M<sup>-1</sup>sec<sup>-1</sup> and the off-rate is about 1.0 sec<sup>-1</sup> (29) giving a dissociation constant of about  $10^{-7}$  M. To estimate on- and off-rates for the higher-affinity binding of fX to platelets, we keep the on-rate the same as for vesicles and adjust the off-rate to give the correct dissociation constant. The rates for fIX binding with platelets are taken to be the same as for fX binding. (b) We assume binding constants for fIXa binding to the specific fIXa binding sites are the same as for shared sites. (c) fV binds with high-affinity to phospholipids (PCPS) (29) and we use the same rate constants reported there to describe fV binding to platelets. (d) The  $K_d$  for fVIII binding with platelets is taken from (12). We set the off-rate  $k_8^{\text{off}}$  for fVIII binding to platelets equal to that for fV binding to platelets, and calculate the on-rate  $k_8^{\text{on}}$ . (e) For prothrombin interactions with platelets,  $K_d$  is reported to be  $5.9 \cdot 10^{-7}$  M (30). We choose  $k_2^{\text{off}}$  and set  $k_2^{\text{on}} = k_2^{\text{off}}/K_d$ . (f) Estimated as described in the text of the Supplementary Information. (g)  $K_d = 10$  nM (31). (h)  $K_d = 1.7$  nM (16).

| Reaction     | Reactants                                      | Products                      | M <sup>-1</sup> sec <sup>-1</sup>    | sec <sup>-1</sup>                       | Note |
|--------------|------------------------------------------------|-------------------------------|--------------------------------------|-----------------------------------------|------|
| Factor IX    | Z <sub>9</sub> , P <sub>9</sub>                | Z <sub>9</sub> <sup>m</sup>   | $k_9^{\text{on}}=1.0 \cdot 10^7$     | $k_9^{\text{off}}=2.5 \cdot 10^{-2}$    | a    |
| Factor IXa   | E <sub>9</sub> , P <sub>9</sub>                | E <sub>9</sub> <sup>m</sup>   | $k_9^{\text{on}}=1.0 \cdot 10^7$     | $k_9^{\text{off}}=2.5 \cdot 10^{-2}$    | a    |
| Factor IXa   | E <sub>9</sub> , P <sub>9</sub> <sup>*</sup>   | E <sub>9</sub> <sup>m,*</sup> | $k_9^{\text{on}}=1.0 \cdot 10^7$     | $k_9^{\text{off}}=2.5 \cdot 10^{-2}$    | b    |
| Factor X     | Z <sub>10</sub> , P <sub>10</sub>              | Z <sub>10</sub> <sup>m</sup>  | $k_{10}^{\text{on}}=1.0 \cdot 10^7$  | $k_{10}^{\text{off}}=2.5 \cdot 10^{-2}$ | a    |
| Factor Xa    | E <sub>10</sub> , P <sub>10</sub>              | E <sub>10</sub> <sup>m</sup>  | $k_{10}^{\text{on}}=1.0 \cdot 10^7$  | $k_{10}^{\text{off}}=2.5 \cdot 10^{-2}$ | a    |
| Factor V     | Z <sub>5</sub> , P <sub>5</sub>                | Z <sub>5</sub> <sup>m</sup>   | $k_5^{\text{on}}=5.7 \cdot 10^7$     | $k_5^{\text{off}}=0.17$                 | c    |
| Factor Vh    | E <sub>5</sub> <sup>h</sup> , P <sub>5</sub>   | E <sub>5</sub> <sup>hm</sup>  | $k_5^{\text{on}}=5.7 \cdot 10^7$     | $k_5^{\text{off}}=0.17$                 | c    |
| Factor Va    | E <sub>5</sub> , P <sub>5</sub>                | E <sub>5</sub> <sup>m</sup>   | $k_5^{\text{on}}=5.7 \cdot 10^7$     | $k_5^{\text{off}}=0.17$                 | c    |
| Factor VIII  | Z <sub>8</sub> , P <sub>8</sub>                | Z <sub>8</sub> <sup>m</sup>   | $k_8^{\text{on}}=5.0 \cdot 10^7$     | $k_8^{\text{off}}=0.17$                 | d    |
| Factor VIIIa | E <sub>8</sub> , P <sub>8</sub>                | E <sub>8</sub> <sup>m</sup>   | $k_8^{\text{on}}=5.0 \cdot 10^7$     | $k_8^{\text{off}}=0.17$                 | d    |
| Factor II    | Z <sub>2</sub> , P <sub>2</sub>                | Z <sub>2</sub> <sup>m</sup>   | $k_2^{\text{on}}=1.0 \cdot 10^7$     | $k_2^{\text{off}}=5.9$                  | e    |
| Factor IIa   | E <sub>2</sub> , P <sub>2</sub>                | E <sub>2</sub> <sup>m</sup>   | $k_2^{\text{on}}=1.0 \cdot 10^7$     | $k_2^{\text{off}}=0.2$                  | f    |
| Factor XI    | Z <sub>11</sub> , P <sub>11</sub>              | Z <sub>11</sub> <sup>m</sup>  | $k_{z11}^{\text{on}}=1.0 \cdot 10^7$ | $k_{z11}^{\text{off}}=0.1$              | g    |
| Factor XIa   | E <sub>11</sub> , P <sub>11</sub> <sup>*</sup> | E <sub>11</sub> <sup>m</sup>  | $k_{e11}^{\text{on}}=1.0 \cdot 10^7$ | $k_{e11}^{\text{off}}=0.017$            | h    |

**S12 Table. REACTIONS ON PLATELET SURFACES** (a)  $k_{z_5^m:e_{10}^m}^{\text{cat}} = 0.046 \text{ sec}^{-1}$  and  $K_M = 10.4 \cdot 10^{-9} \text{ M}$  (32). (b) The rate constants for thrombin activation of fV on platelets are assumed to be the same as in plasma. (c)  $k_{z_8^m:e_{10}^m}^{\text{cat}} = 0.023 \text{ sec}^{-1}$  and  $K_M = 2.0 \cdot 10^{-8} \text{ M}$  (25). (d) The rate constants for thrombin activation of fVIII on platelets are assumed to be the same as in plasma. (e) The formation of the tenase and prothrombinase complexes is assumed to be very fast with  $K_d = 1.0 \cdot 10^{-10} \text{ M}$  (33). (f)  $k_{z_{10}^m:ten}^{\text{cat}} = 20 \text{ sec}^{-1}$  and  $K_M = 1.6 \cdot 10^{-7} \text{ M}$  (34). (g)  $k_{z_2^m:pro}^{\text{cat}} = 30 \text{ sec}^{-1}$  and  $K_M = 3.0 \cdot 10^{-7} \text{ M}$  (35). (h)  $k_{z_{11}^m:e_2^m}^{\text{cat}} = 1.3 \cdot 10^{-4}$ ,  $K_M = 50 \text{ nM}$  (26). Rate constants apply also for thrombin-activation of Plt-XIa-XI. (i)  $k_{z_9^m:e_{11}^m}^{\text{cat}} = 0.21$ ,  $K_M = 0.2 \mu\text{M}$  (27, 28). Rate constants apply also for activation of platelet-bound IX by Plt-XIa-XIa.

| Reaction                   | Reactants            | Complex               | Product       | $\text{M}^{-1}\text{sec}^{-1}$          | $\text{sec}^{-1}$            | $\text{sec}^{-1}$                                     | Note |
|----------------------------|----------------------|-----------------------|---------------|-----------------------------------------|------------------------------|-------------------------------------------------------|------|
| Activation<br>(of -, by -) |                      |                       |               |                                         |                              |                                                       |      |
| (V, Xa)                    | $Z_5^m, E_{10}^m$    | $Z_5^m : E_{10}^m$    | $E_5^{hm}$    | $k_{z_5^m:e_{10}^m}^+ = 1.0 \cdot 10^8$ | $k_{z_5^m:e_{10}^m}^- = 1.0$ | $k_{z_5^m:e_{10}^m}^{\text{cat}} = 4.6 \cdot 10^{-2}$ | a    |
| (V, IIa)                   | $Z_5^m, E_2^m$       | $Z_5^m : E_2^m$       | $E_5^m$       | $k_{z_5^m:e_2^m}^+ = 1.73 \cdot 10^7$   | $k_{z_5^m:e_2^m}^- = 1.0$    | $k_{z_5^m:e_2^m}^{\text{cat}} = 0.23$                 | b    |
| (Vh, IIa)                  | $E_5^{hm}, E_2^m$    | $E_5^{hm} : E_2^m$    | $E_5^m$       | $k_{z_5^m:e_2^m}^+ = 1.73 \cdot 10^7$   | $k_{z_5^m:e_2^m}^- = 1.0$    | $k_{z_5^m:e_2^m}^{\text{cat}} = 0.23$                 | b    |
| (VIII, Xa)                 | $Z_8^m, E_{10}^m$    | $Z_8^m : E_{10}^m$    | $E_8^m$       | $k_{z_8^m:e_{10}^m}^+ = 5.1 \cdot 10^7$ | $k_{z_8^m:e_{10}^m}^- = 1.0$ | $k_{z_8^m:e_{10}^m}^{\text{cat}} = 2.3 \cdot 10^{-2}$ | c    |
| (VIII, IIa)                | $Z_8^m, E_2^m$       | $Z_8^m : E_2^m$       | $E_8^m$       | $k_{z_8^m:e_2^m}^+ = 2.64 \cdot 10^7$   | $k_{z_8^m:e_2^m}^- = 1.0$    | $k_{z_8^m:e_2^m}^{\text{cat}} = 0.9$                  | d    |
| (X, VIIIa:IXa)             | $Z_{10}^m, TEN$      | $Z_{10}^m : TEN$      | $E_{10}^m$    | $k_{z_{10}^m:ten}^+ = 1.31 \cdot 10^8$  | $k_{z_{10}^m:ten}^- = 1.0$   | $k_{z_{10}^m:ten}^{\text{cat}} = 20.0$                | f    |
| (X, VIIIa:IXa*)            | $Z_{10}^m, TEN^*$    | $Z_{10}^m : TEN^*$    | $E_{10}^m$    | $k_{z_{10}^m:ten}^+ = 1.31 \cdot 10^8$  | $k_{z_{10}^m:ten}^- = 1.0$   | $k_{z_{10}^m:ten}^{\text{cat}} = 20.0$                | f    |
| (II, Vh:Xa)                | $Z_2^m, PROh$        | $Z_2^m : PROh$        | $E_2^m$       | $k_{z_2^m:pro}^+ = 1.03 \cdot 10^8$     | $k_{z_2^m:pro}^- = 1.0$      | $k_{z_2^m:pro}^{\text{cat}} = 30.0$                   | g    |
| (II, Va:Xa)                | $Z_2^m, PRO$         | $Z_2^m : PRO$         | $E_2^m$       | $k_{z_2^m:pro}^+ = 1.03 \cdot 10^8$     | $k_{z_2^m:pro}^- = 1.0$      | $k_{z_2^m:pro}^{\text{cat}} = 30.0$                   | g    |
| (XI-XI, IIa)               | $Z_{11}^m, E_2^m$    | $Z_{11}^m : E_2^m$    | $E_{11}^{hm}$ | $k_{z_{11}^m:e_2^m}^+ = 2.0 \cdot 10^7$ | $k_{z_{11}^m:e_2^m}^- = 1.0$ | $k_{z_{11}^m:e_2^m}^{\text{cat}} = 1.3 \cdot 10^{-4}$ | h    |
| (IX, XIa)                  | $Z_9^m, E_{11}^{hm}$ | $Z_9^m : E_{11}^{hm}$ | $E_9$         | $k_{z_9^m:e_{11}^m}^+ = 0.6 \cdot 10^7$ | $k_{z_9^m:e_{11}^m}^- = 1.0$ | $k_{z_9^m:e_{11}^m}^{\text{cat}} = 0.21$              | i    |
| Binding<br>(of -, with -)  |                      |                       |               |                                         |                              |                                                       |      |
| (VIIIa, IXa)               | $E_8^m, E_9^m$       |                       | $TEN$         | $k_{ten}^+ = 1.0 \cdot 10^8$            | $k_{ten}^- = 0.01$           |                                                       | e    |
| (VIIIa, IXa*)              | $E_8^m, E_9^{m,*}$   |                       | $TEN^*$       | $k_{ten}^+ = 1.0 \cdot 10^8$            | $k_{ten}^- = 0.01$           |                                                       | e    |
| (Vh, Xa)                   | $E_5^{hm}, E_{10}^m$ |                       | $PROh$        | $k_{pro}^+ = 1.0 \cdot 10^8$            | $k_{pro}^- = 0.01$           |                                                       | e    |
| (Va, Xa)                   | $E_5^m, E_{10}^m$    |                       | $PRO$         | $k_{pro}^+ = 1.0 \cdot 10^8$            | $k_{pro}^- = 0.01$           |                                                       | e    |

**S13 Table. INHIBITION REACTIONS** (a) From (19). (b) From (36). (c) For inhibition of fVa by APC,  $k_{e_5^m:APC}^{\text{cat}} = 0.5 \text{ sec}^{-1}$  and  $K_M = 12.5 \cdot 10^{-9}$  (37). We assume the same reaction rates for the inhibition of fVIIIa by APC. (d) From (38). (e) From (39). (f) From (40). (g)  $K_d = 0.5 \text{ nM}$  and  $[PC] = 65 \text{ nM}$  (41). (h) From (42). (i)  $k_{PC:TM:e_2^c} = 0.167 \text{ sec}^{-1}$ ,  $K_M = 0.7 \cdot 10^{-6} \text{ M}$  (43).

| Reaction                               | Reactants               | Product                 | $M^{-1}sec^{-1}$                        | $sec^{-1}$                               | $sec^{-1}$                        | Note |
|----------------------------------------|-------------------------|-------------------------|-----------------------------------------|------------------------------------------|-----------------------------------|------|
| <b>Inactivation</b><br>(of -, by -)    |                         |                         |                                         |                                          |                                   |      |
| (IXa, AT-III)                          | $E_9, AT$               | $E_9 : AT$              |                                         | $k_{e_9}^{AT} = 4.8 \cdot 10^2$          |                                   | a    |
| (Xa, AT-III)                           | $E_{10}, AT$            | $E_{10} : AT$           |                                         | $k_{e_{10}}^{AT} = 3.5 \cdot 10^3$       |                                   | a    |
| (IIa, AT-III)                          | $E_2, AT$               | $E_2 : AT$              |                                         | $k_{e_2}^{AT} = 1.4 \cdot 10^4$          |                                   | a    |
| (XIa, AT-III)                          | $E_{11}, AT$            | $E_{11} : AT$           |                                         | $k_{e_{11}}^{AT} = 2.4 \cdot 10^2$       |                                   | a    |
| (XIa:AT, AT-III)                       | $E_{11} : AT, AT$       | $AT : E_{11} : AT$      |                                         | $k_{e_{11}}^{AT} = 2.4 \cdot 10^2$       |                                   | a    |
| (IXa, ATH)                             | $E_9, ATH$              | $E_9 : ATH$             |                                         | $k_{e_9}^{AT} = 5 \cdot 10^5$            |                                   | b    |
| (Xa, ATH)                              | $E_{10}, ATH$           | $E_{10} : ATH$          |                                         | $k_{e_{10}}^{AT} = 1.3 \cdot 10^6$       |                                   | b    |
| (IIa, ATH)                             | $E_2, ATH$              | $E_2 : ATH$             |                                         | $k_{e_2}^{AT} = 5.3 \cdot 10^6$          |                                   | b    |
| (XIa, ATH)                             | $E_{11}, ATH$           | $E_{11} : ATH$          |                                         | $k_{e_{11}}^{AT} = 1 \cdot 10^4$         |                                   | b    |
| (XIa:AT, ATH)                          | $E_{11} : AT, ATH$      | $ATH : E_{11} : ATH$    |                                         | $k_{AT:e_{11}}^{in} = 1 \cdot 10^4$      |                                   | b    |
| (APC, Va)                              | $APC, E_5^m$            | none                    | $k_{e_5^m:APC}^+ = 1.2 \cdot 10^8$      | $k_{e_5^m:APC}^- = 1.0$                  | $k_{e_5^m:APC}^{cat} = 0.5$       | c    |
| (APC, VIIIa)                           | $APC, E_8^m$            | none                    | $k_{e_8^m:APC}^+ = 1.2 \cdot 10^8$      | $k_{e_8^m:APC}^- = 1.0$                  | $k_{e_8^m:APC}^{cat} = 0.5$       | c    |
| <b>Binding</b><br>(of -, with -)       |                         |                         |                                         |                                          |                                   |      |
| (TFPI, Xa)                             | $TFPI, E_{10}$          | $TFPIa$                 | $k_{tfpia:e_{10}}^+ = 1.6 \cdot 10^7$   | $k_{tfpia:e_{10}}^- = 3.3 \cdot 10^{-4}$ |                                   | d    |
| (TFPI, Vh)                             | $TFPI, E_5^h$           | $TFPI : E_5^h$          | $k_{tfpi:e_5^h}^+ = 0.05 \cdot 10^9$    | $k_{tfpi:e_5^h}^- = 0.0045$              |                                   | e    |
| (TFPI:Xa, Vh)                          | $TFPIa, E_5^h$          | $E_5^h : TFPI : E_{10}$ | $k_{tfpi:e_5^h}^+ = 0.05 \cdot 10^9$    | $k_{tfpi:e_5^h}^- = 0.0045$              |                                   | e    |
| (TFPI:Vh, Xa)                          | $TFPI : E_5^h, E_{10}$  | $E_5^h : TFPI : E_{10}$ | $k_{tfpia:e_{10}}^+ = 1.6 \cdot 10^7$   | $k_{tfpia:e_{10}}^- = 3.3 \cdot 10^{-4}$ |                                   | d    |
| (Xa:Vh, TFPI)                          | $E_{10} : E_5^h, TFPIa$ | $E_{10} : E_5^h : TFPI$ | $k_{tfpibprohvs}^+ = 0.05 \cdot 10^9$   | $k_{tfpibprohvs}^- = 0.0045$             |                                   | e    |
| (Xa:Vh, TFPI)                          | $E_{10} : E_5^h, TFPIa$ | $TFPI : E_{10} : E_5^h$ | $k_{tfpibprohvs}^+ = 1.6 \cdot 10^7$    | $k_{tfpibprohvs}^- = 3.3 \cdot 10^{-4}$  |                                   | d    |
| (TFPIa, TF:VIIa)                       | $TFPIa, E_7^m$          | $TFPIa : E_7^m$         | $k_{tfpia:e_{10}}^+ = 1.6 \cdot 10^7$   | $k_{tfpia:e_{10}}^- = 3.3 \cdot 10^{-4}$ |                                   | f    |
| (TM, Thrombin)                         | $TM, E_2^{ec}$          | $TM : E_2^{ec}$         | $k_{TM}^{on} = 1.0 \cdot 10^8$          | $k_{TM}^{off} = 5.0 \cdot 10^{-2}$       |                                   | g    |
| (AT-III, Heparin)                      | $AT, Hep$               | $ATH$                   | $k_{ATH}^+ = 1.0$                       | $k_{ATH}^- = 2.77 \cdot 10^7$            |                                   | h    |
| <b>Activation</b><br>(of -, by -)      |                         |                         |                                         |                                          |                                   |      |
| (PC, TM:E <sub>2</sub> <sup>ec</sup> ) | $TM : E_2^{ec}$         | $APC$                   | $k_{PC:TM:e_2^{ec}}^+ = 1.7 \cdot 10^6$ | $k_{PC:TM:e_2^{ec}}^- = 1.0$             | $k_{PC:TM:e_2^{ec}}^{cat} = 0.16$ | i    |

**S14 Table. PLATELET TRANSITIONS** (a) Estimated from data in (44, 45) as described in (46). (b) Estimated from data in (47) as described in (46). SE=subendothelium.

| Reactants                                   | Reactants    | Products         | $M^{-1}sec^{-1}$               | $sec^{-1}$             | Note |
|---------------------------------------------|--------------|------------------|--------------------------------|------------------------|------|
| Unactivated platelet adhering to SE         | $PL, SE$     | $PL_a^s$         | $k_{adh}^+ = 2 \cdot 10^{10}$  | $k_{adh}^- = 0$        | a    |
| Activated platelet adhering to SE           | $PL_a^v, SE$ | $PL_a^v$         | $k_{adh}^+ = 2 \cdot 10^{10}$  | $k_{adh}^- = 0$        | a    |
| Platelet activation by platelet in solution | $PL, PL_a^v$ | $2PL_a^v$        | $k_{plt}^{act} = 3 \cdot 10^8$ |                        | b    |
| Platelet activation on SE                   | $PL, PL_a^s$ | $PL_a^v, PL_a^s$ | $k_{plt}^{act} = 3 \cdot 10^8$ |                        | b    |
| Platelet activation by thrombin             | $PL, E_2$    | $PL_a^v$         |                                | $k_{e_2}^{act} = 0.50$ | b    |

### S3 CONVERSION OF HEPARIN POTENCY TO MOLAR CONCENTRATION

Based on the recommended dosage of heparin treatment (0.3-0.7 U/ml) (48), we use the value of 0.5 U/ml. Based on the information from second international standard for heparin by WHO, the conversion factor will be 130 U/mg (49). By using the mean molecular weight of heparin as 15kDa (50), we can get:

$$0.5 \text{ U/ml} * 1/130 \text{ mg/U} = 0.0038 \text{ mg/ml}$$

$$0.0038 \text{ g/L} * 1/15000 \text{ mol/g} = 2.53 * 10^{-7} \text{ M} = 253 \text{ nM}$$

For the LMWH, since the molecular weight of LMWH varies based on different product (51), we use 5kDa as its molecular weight. Therefore, the concentration of heparin at 100% is determined by:

$$0.0038 \text{ g/L} * 1/5000 \text{ mol/g} = 2.53 * 10^{-7} \text{ M} = 759 \text{ nM}$$

Both concentrations were set as 100% baseline dosage concentration. For example, when we use 50% concentration of UFH and LMWH, we are using 126.5 nM and 379.5 nM respectively.



## S4 LOCAL SENSITIVITY ANALYSIS - METHOD

As in our previous work (52), we again focus on the sensitivity of three special thrombin metrics:

1. Lag time: A measure of how fast the system is turned on, defined as the amount of time required for thrombin to reach 1 nM.
2. Maximum relative rate: A measure of how fast thrombin is produced once the system is turned on, defined as

$$\max_{t > t_{1nM}} \left( \frac{d[\text{thrombin}]}{dt} / [\text{thrombin}] \right).$$

3. Final concentration: The thrombin concentration after 20 minutes of clotting activity.

We examine the sensitivity of these metrics to two types of parameter variations: (i) the plasma levels of seven zymogens and two inhibitors, and (ii) the values of 24 new kinetic parameters that are related to TFPI reactions. We used a derivative-based approach to quantify the sensitivity of each metric with respect to centered difference in the parameters in a range of values (50%, 75%, 100%, 125% and 150% for the plasma level parameters, and 90%, 95%, 100%, 105% and 110% for kinetic parameters). The standard values for each plasma level parameters were set to the initial conditions. Similar to our previous SA results (52), we found that each of the metrics behaved monotonically with respect to varying each plasma level from 50% to 150% of the standard values, as shown in Fig. (S2A-C) and the kinetic parameters from 90% to 110% as shown in Fig. (S3A-C). The min/max values of these monotonic curves shows the change in the thrombin metric due to the factor change. Clotting factor variations had a significant effect on all three thrombin metrics but the largest change in the thrombin metrics due to variations in the kinetic parameters was less than 0.2% and therefore, we did not characterize the sensitivity of these parameters further. For the clotting factors and inhibitors, we quantified their sensitivity by the absolute difference they produced in each metric when considering their extremal values (i.e., 50% and 150%). For each metric, we ranked the parameters by considering their relative absolute difference. We define  $x = (x_1, x_2, \dots, x_p)$  to be the standard model parameter values and  $m_i(x_j, y\%)$  to be the values of the  $i$ -th metric when parameter  $j$  is chosen to be  $y\%$  of its standard value and all other parameters are chosen to be at their standard value. The local sensitivity of the  $i$ -th metric to the  $j$ -th parameter is then:

$$LS_j^i = \frac{|m_i(x_j, 150\%) - m_i(x_j, 50\%)|}{\max_k (|m_i(x_k, 150\%) - m_i(x_k, 50\%)|)}$$

Each sensitivity score, LS, is then a number between 0 and 1 and we use these values to rank the input sensitivities. In our results, we denote LS scores higher than 0.75 with solid black triangles, LS scores from 0.25 to 0.75 as gray triangles, and for LS scores lower than 0.25 we use open triangles. In addition, because the response of the system outputs was monotonic throughout the entire range, we show separately the change in each metric for the 50% increase with the triangle upward and a 50% decrease with a triangle facing downward. Then the y-value of the triangle corresponds to its result on the output.

The local SA results in Fig. (S2D-I) reveal the most influential clotting factors and inhibitors, when perturbed one at a time for each of the three thrombin metrics. Fig. (S2D) shows that FVIII and FX have the greatest effect on the lag time, where an increase in either FVIII or FX levels by 50% leads to an approximately 10% decrease in the lag time from baseline. This is seen with the solid black (LS scores above 0.75), upward-facing (increase in factor level) triangles, with y-value near -10% showing the decrease in lag time. Comparing with sensitivity results from our old model((52)), we see an increased sensitivity to TFPI, where a decrease/increase by 50% leads to about a 8% decrease/5% increase in the lag time from baseline, respectively, although the TFPI LS score still does not reach 0.75. Fig. (S2E) shows that variations in FVIII, FIX, and FX have the largest effect on the maximum relative rate of thrombin generation, and this metric still has low sensitivity to TFPI. These findings are the same as in our previous results and make sense since these factors influence the rate of formation of the tenase complex on platelets, which affects the amplification stage of coagulation, and the inhibitory effect by TFPI does not alter such amplification process. It also indicates that new TFPI inhibitory reactions does not have significant influence towards the rate at which thrombin is being made. Fig. (S2F) shows that the final concentration metric is sensitive only to prothrombin (FII) as was found previously((52)). The corresponding LS scores are shown in Fig. (S2H-I).

Fig.(S3) demonstrates the local SA results for each of kinetic parameters that are related to TFPI reactions. Forward and reverse rate for each of the reaction are varied by 10% and change in lag time, maximum relative rate and final concentrations were observed. The results indicate that slight perturbation in reaction kinetics has minimal effect towards these three thrombin metrics, where none of the kinetic parameter caused more than 1% change from baseline in each cases. Such insensitiveness of the kinetic parameters, however, indicates the tolerance of the model towards the possible error in the kinetic parameters retrieved from experimental design.

## S5 OTHER FIGURES

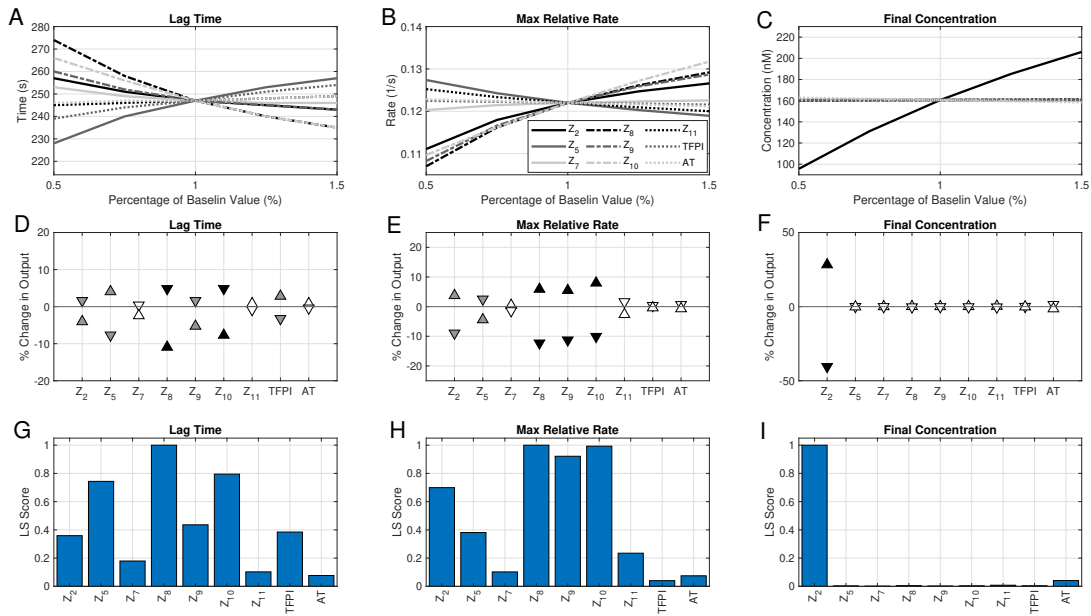

Figure S2: Local sensitivity analysis of clotting factor levels on thrombin metrics. The initial conditions of clotting factor and inhibitor levels were varied between 50% and 150% of their baseline values. Shown are (A,B,C) the amplitude change in lag time, maximum relative rate, and final thrombin concentration, (D,E,F) the percentage change in each of the metrics, and (G,H,I) the LS scores for each metric and for each species. Solid black triangles represent the species with LS score higher than 0.75, gray triangles for LS scores from 0.25 to 0.75, and open triangles for LS lower than 0.25. The arrow direction indicates if the variable was increased or decreased.

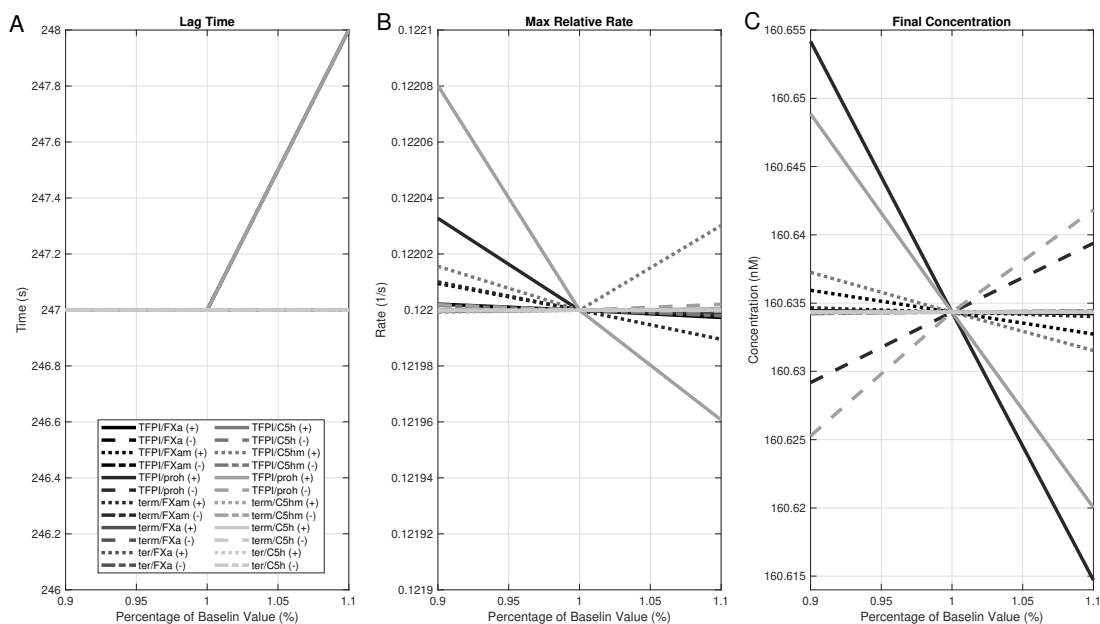

Figure S3: Local sensitivity analysis of TFPI-related kinetic rates on thrombin metrics. The new kinetic parameters were varied between 90% and 110% of their baseline values. Shown are (A,B,C) the amplitude of the changes in the lag time, maximum relative rate and final thrombin concentration due to the kinetic parameter variations. The plus/minus sign indicates the association/dissociation rate, respectively. Lower case *m* represents the components that are bound to platelet surface. The forward slash shows which two components are interacting each other, while the "ter" and "term" indicates interactions that involve a ternary complex and whether the species is in plasma or bound to the platelet surface, respectively. For example: term/FXa (+) indicates the rate of association between the platelet-bound TFPI:FV-h complex and the fluid phase FXa to form the ternary complex FXa:TFPI:FV-h.

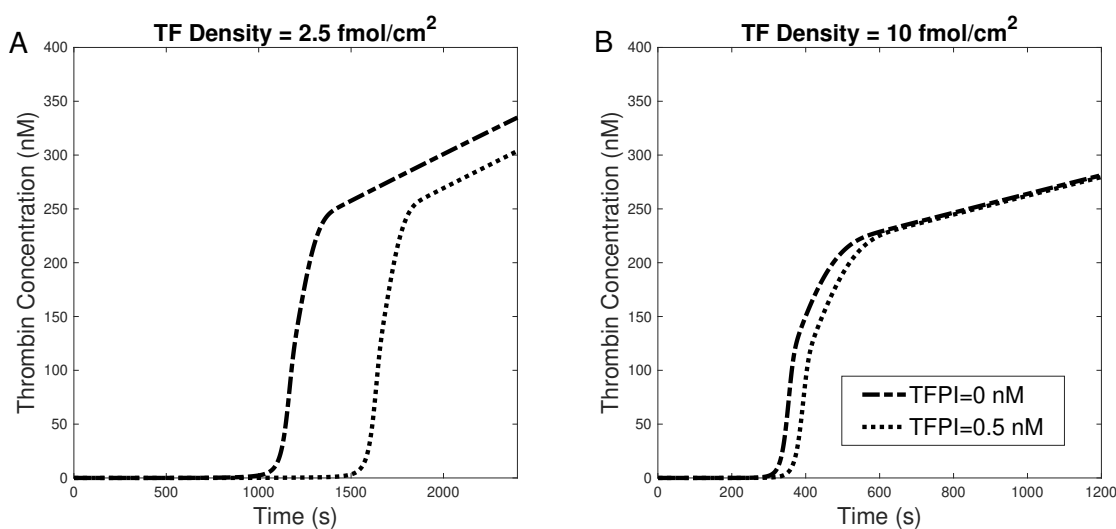

Figure S4: Thrombin generation time courses under different TFPI levels (0 nM and 0.5 nM) plotted in linear scale. TF level is varied by 2.5 fmol/cm<sup>2</sup> (A) and 10 fmol/cm<sup>2</sup> (B). Shear rate is fixed at 100/s.

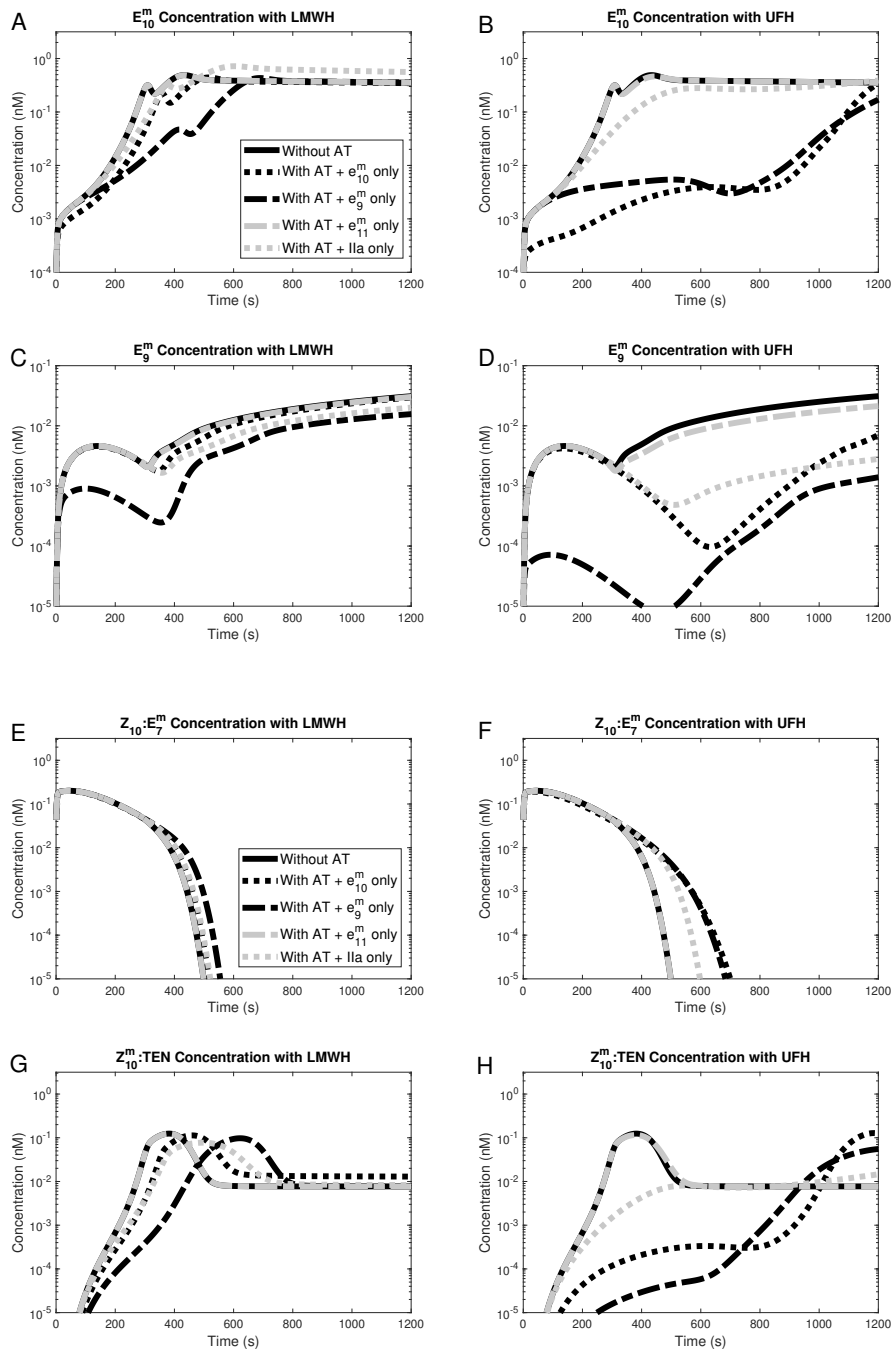

Figure S5: FXa concentration in the presence of LMWH (A) or UFH (B), FIXa concentration in the presence of LMWH (C) or UFH (D), FX:TF:VIIa concentration in the presence of LMWH (E) or UFH (F), and FX:tenase concentration in the presence of LMWH (G) or UFH (H). The time course is obtained from simulations in which we turn off all the AT-mediated inactivation reactions and then allow inhibition of FXa, FIXa, FXIa and thrombin, individually and one by one. Each curve thus shows thrombin/tenase generation when there is either no or only one inactivation reaction that exists in the system. TF density was set to 15 fmol/cm<sup>2</sup> and shear rate was set to 100/s. Heparin concentration is fixed to 100% of the standard therapeutic concentration.

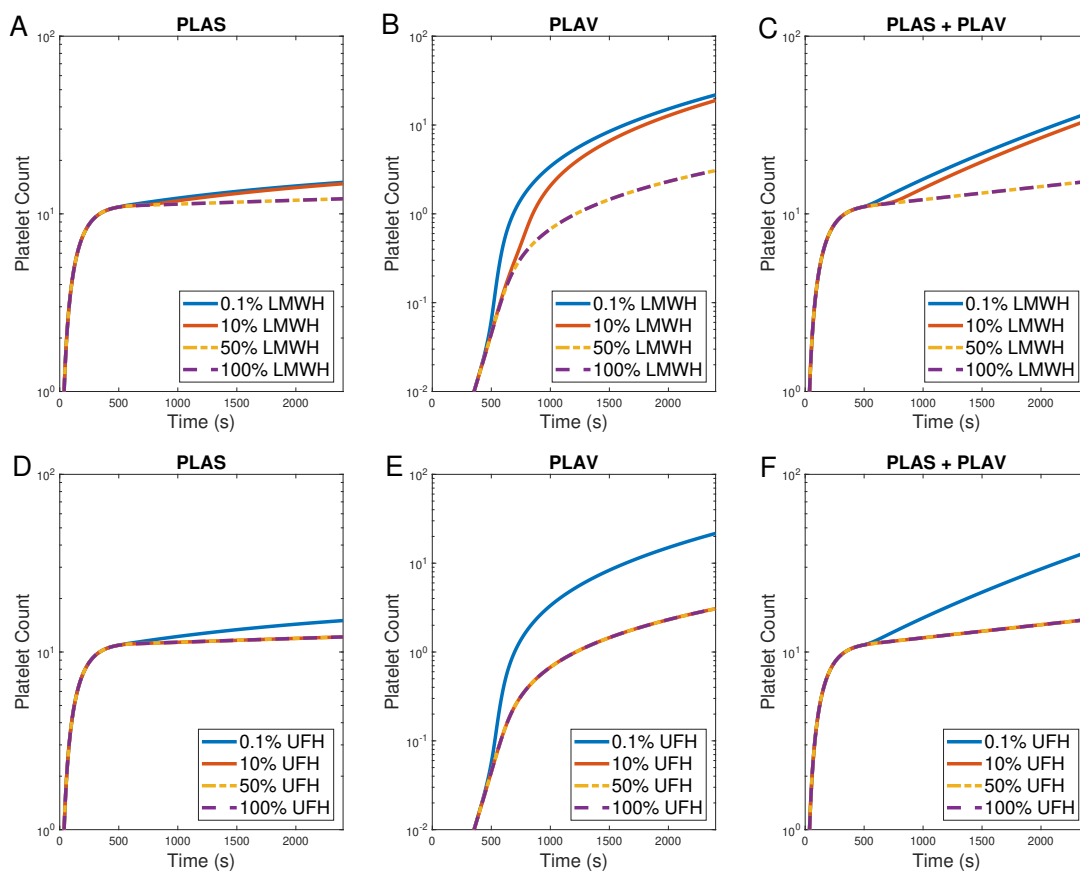

Figure S6: Subendothelium-attached platelet count (PLAS) and platelet-attached-activated platelet count (PLAV) time course with varied LMWH treatment (A-C) or UFH treatment (D-F). TF level is fixed to  $6 \text{ fmol/cm}^2$ . We examined how heparin in the system might affect platelet deposition. We specifically looked at two types of platelets: those that are activated and bound to subendothelium (PLAS), and those that are activated and bound to deposited platelets (PLAV), and their sum. The platelets accumulate on the subendothelium (SE) and PLAV eventually plateaus due to the limited space at the SE, whereas platelets above the injury site will continue to grow. Increasing the heparin concentrations led to decreases in both platelet species through time. This is because by increasing amount of heparin, it can greatly reduce the thrombin in the reaction zone, which leads to reduced amount of platelet to be activated by thrombin. Such a reduction can cause a shift from platelet-bound platelet to subendothelium-bound platelet. The increase in subendothelium-bound platelet will physically cover up the surface, which can negatively influence the initiation phase of coagulation.

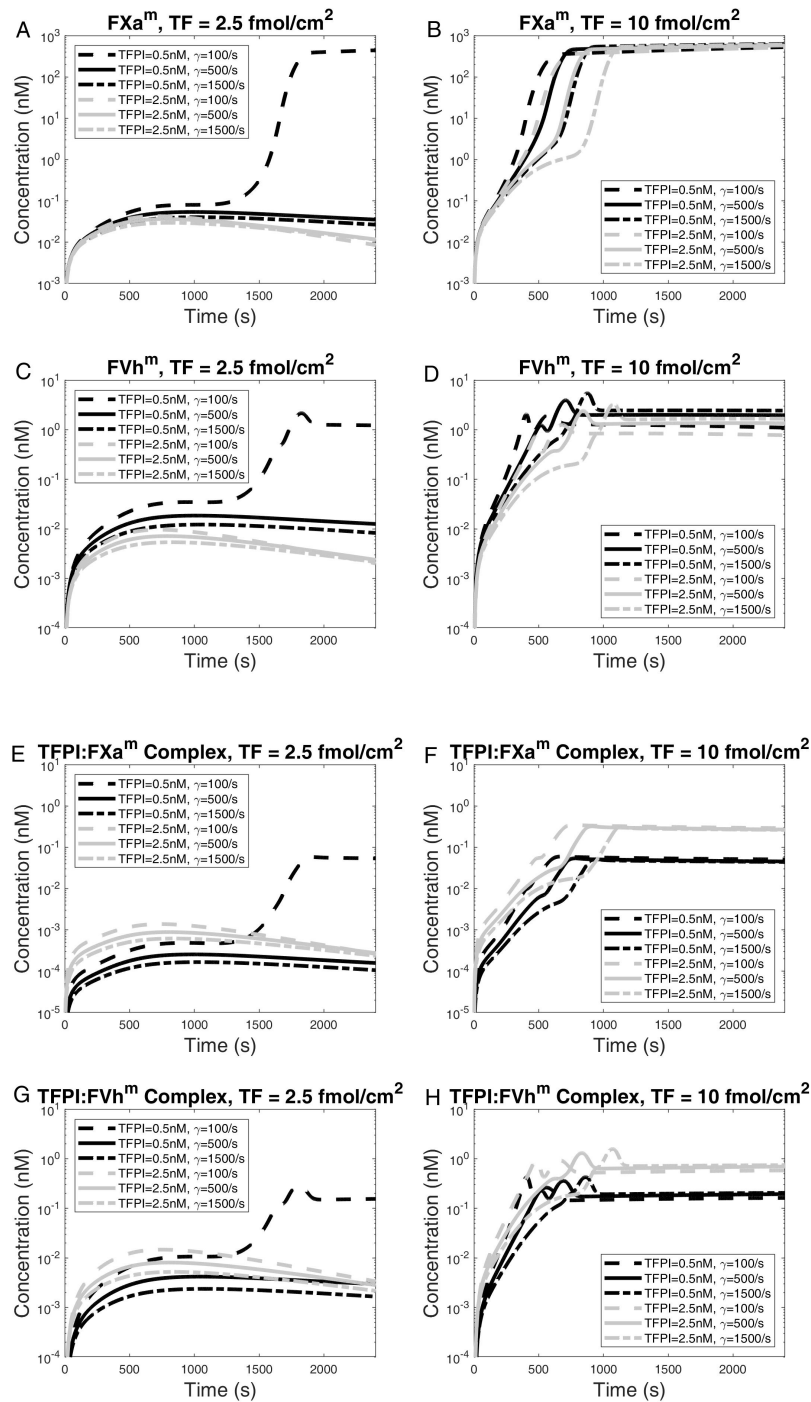

Figure S7: Concentration time course of platelet surface bound FXa, FV-h, and their complexes with TFPI. TF level is varied by 2.5 fmol/cm<sup>2</sup> (A,C,E,G) and 10 fmol/cm<sup>2</sup> (B,D,F,H). Under each TF level, TFPI level is varied by 0.5 nM and 2.5 nM, and shear rate is varied by 100/s, 500/s and 1500/s.

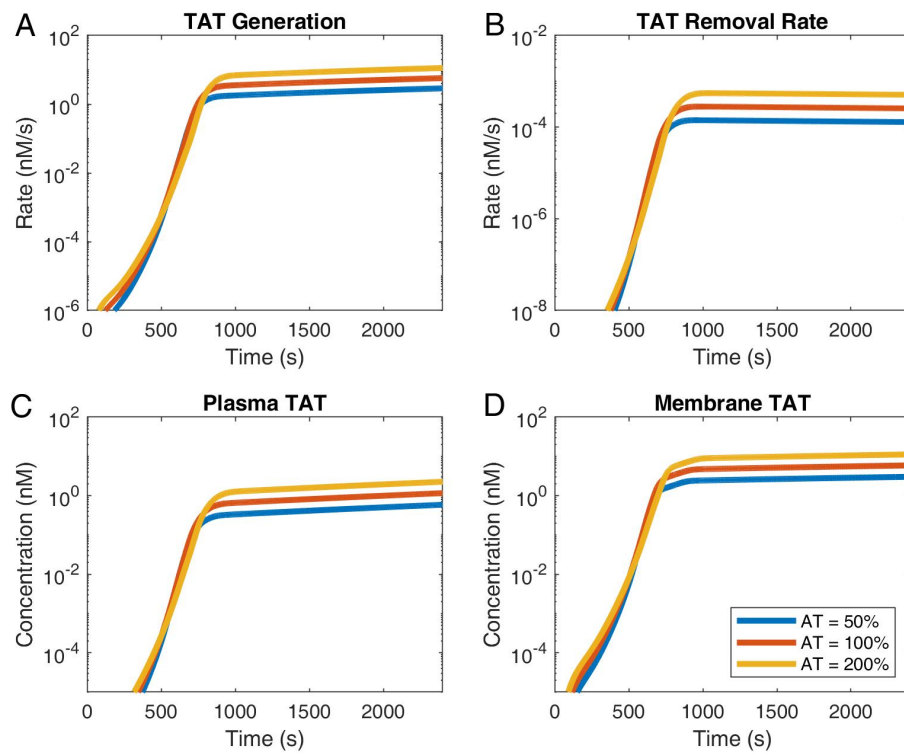

Figure S8: Instantaneous generation and removal of TAT (A,B), and accumulative concentration of TAT in plasma (C) and on the platelet membrane (D). TF level is fixed to  $5 \text{ fmol/cm}^2$ , and shear rate is fixed to  $100/\text{s}$ .

## REFERENCES

1. Kuharsky, A. L., and A. L. Fogelson, 2001. Surface-Mediated Control of Blood Coagulation: The Role of Binding Site Densities and Platelet Deposition. *Biophysical Journal* 80:1050–1074. <https://linkinghub.elsevier.com/retrieve/pii/S0006349501760857>.
2. Fogelson, A. L., and N. Tania, 2005. Coagulation under Flow: The Influence of Flow-Mediated Transport on the Initiation and Inhibition of Coagulation. *Pathophysiol Haemos Thromb* 34:91–108. <https://www.karger.com/Article/FullText/89930>.
3. Fogelson, A., Y. Hussain, and K. Leiderman, 2012. Blood Clot Formation under Flow: The Importance of Factor XI Depends Strongly on Platelet Count. *Biophysical Journal* 102:10–18. <https://linkinghub.elsevier.com/retrieve/pii/S0006349511013142>.
4. Turitto, V. T., and E. F. Leonard, 1972. Platelet adhesion to a spinning surface. *Trans. Amer. Soc. Artif. Int. Organs* 18:348–54.
5. Young, M., P. Carroad, and R. Bell, 1980. Estimation of diffusion coefficients of proteins. *Biotech and Bioeng* 22:947–955.
6. Mann, K., M. Nesheim, W. Church, P. Haley, and S. Krishnaswamy, 1990. Surface-dependent Reactions of the Vitamin K-dependent enzyme complexes. *Blood* 76:1–16.
7. Mann, K., E. Bovill, and S. Krishnaswamy, 1991. Surface-dependent reactions in the propagation phase of blood coagulation. *Ann. N. Y. Acad. Sci.* 614:63–75.
8. Morrissey, J. H., 1995. Tissue Factor Modulation of Factor VIIa Activity: Use in Measuring Trace Levels of Factor VIIa in Plasma. *Thromb. Haemost.* 74:185–188.
9. Novotny, W., S. Brown, J. Miletich, D. Rader, and G. Broze, 1991. Plasma antigen levels of the lipoprotein-associated coagulation inhibitor in patient samples. *Blood* 78:387–93.
10. Weiss, H. J., 1975. Platelet Physiology and Abnormalities of Platelet Function (Part 1). *New Engl. J. Med.* 293:531–541.
11. Walsh, P. N., 1994. Platelet-Coagulant Protein Interactions. In R. W. Colman, J. Hirsh, V. J. Marder, and E. W. Salzman, editors, *Hemostasis and Thrombosis: Basic Principles and Clinical Practice*, J.B. Lippincott Company, Philadelphia, PA, 629–651. 3d edition.
12. Nesheim, M. E., D. D. Pittman, J. H. Wang, D. Slonosky, A. R. Giles, and R. J. Kaufman, 1988. The binding of S-labeled recombinant Factor VIII to activated and unactivated human platelets. *J Biol Chem* 263:16467.
13. Ahmad, S., R. Rawala-Sheikh, and P. Walsh, 1989. Comparative interactions of Factor IX and Factor IXa with human platelets. *Journal of Biological Chemistry* 264:3244–3251.
14. Mann, K., S. Krishnaswamy, and J. Lawson, 1992. Surface-dependent Hemostasis. *Semin Hematol* 29:213–26.
15. Baglia, F., B. Jameson, and P. Walsh, 1995. Identification and Characterization of a Binding Site for Platelets in the Apple 3 domain of coagulation Factor XI. *J Biol Chem* 270:6734–40.
16. Miller, T., D. Sinha, T. Baird, and P. Walsh, 2007. A Catalytic Domain Exosite (Cys<sup>527</sup>-Cys<sup>542</sup>) in Factor XIa mediates binding to a site on activated platelets. *Biochemistry* 46:14450–60.
17. Tracy, P., L. L. Eide, E. J. Bowie, and K. G. Mann, 1982. Radioimmunoassay of factor V in human plasma and platelets. *Blood* 60:59–63.
18. Hubbell, J. A., and L. V. McIntire, 1986. Platelet Active Concentration Profiles Near Growing Thrombi. A Mathematical Consideration. *Biophys J* 50:937–945.
19. Olson, S. T., I. Björk, and J. D. Shore, 1993. [30] Kinetic characterization of heparin-catalyzed and uncatalyzed inhibition of blood coagulation proteinases by antithrombin. In *Methods in Enzymology*, Elsevier, volume 222, 525–559. <https://linkinghub.elsevier.com/retrieve/pii/007668799322033C>.
20. Butenas, S., and K. Mann, 1996. Kinetics of Human Factor VII activation. *Biochemistry* 35:1904–1910.



21. Limentani, S. A., B. C. Furie, and B. Furie, 1994. The Biochemistry of Factor IX. In R. Colman, J. Hirsh, V. Marder, and E. Salzman, editors, Hemostasis and Thrombosis: Basic Principles and Clinical Practice, J.B. Lippincott Company, Philadelphia, PA, 94–108. 3d edition.
22. Nemerson, Y., 1992. The Tissue Factor Pathway of Blood Coagulation. *Semin Hematol* 29:170–176.
23. Monkovic, D. D., and P. B. Tracy, 1990. Functional Characterization of Human Platelet-released Factor V and its Activation by Factor Xa and Thrombin. *J Biol Chem* 265:17132–40.
24. Hill-Eubanks, D., and P. Lollar, 1990. von Willibrand factor is a cofactor for thrombin-catalyzed cleavage of the Factor VIII light chain. *J Biol Chem* 265:17854–8.
25. Lollar, P., G. Knutson, and D. Fass, 1985. Activation of Porcine Factor VIII:C by Thrombin and Factor Xa. *Biochemistry* 24:8056–8064.
26. Gailani, D., and G. Broze Jr., 1991. Factor XI activation in a revised model of blood coagulation. *Science* 253:909–12.
27. Gailani, D., D. Ho, M. F. Sun, Q. Cheng, and P. N. Walsh, 2001. Model for a Factor IX activation complex on blood platelets: dimeric conformation of Factor XIa is essential. *Blood* 97:3117–22.
28. Sinha, D., M. Marcinkiewicz, D. Navaneetham, and P. Walsh, 2007. Macromolecular substrate-binding exosite on both the heavy and light chains of Factor XIa mediate the formation of the Michaelis Complex required for Factor IX activation. *Biochemistry* 46:9830–9.
29. Krishnaswamy, S., K. C. Jones, and K. G. Mann, 1988. Prothrombinase Complex Assembly. Kinetic Mechanism of Enzyme Assembly on Phospholipid Vesicles. *J Biol Chem* 263:3823–3834.
30. Mann, K. G., 1994. Prothrombin and thrombin. In R. Colman, J. Hirsh, V. Marder, and E. Salzman, editors, Hemostasis and Thrombosis: Basic Principles and Clinical Practice, J.B. Lippincott Company, Philadelphia, PA, 184–199. 3d edition.
31. Greengard, J., M. Heeb, E. Ersdal, P. Walsh, and J. Griffin, 1986. Binding of coagulation Factor XI to washed human platelets. *Biochemistry* 25:3884–90.
32. Monkovic, D., and P. Tracy, 1990. Activation of human Factor V by Factor Xa and thrombin. *Biochemistry* 29:1118.
33. Mann, K. G., 1987. The assembly of blood clotting complexes on membranes. *TIBS* 12:229–233.
34. Rawala-Sheikh, R., S. Ahmad, B. Ashby, and P. N. Walsh, 1990. Kinetics of coagulation Factor X activation by platelet-bound Factor IXa. *Biochemistry* 29:2606–11.
35. Nesheim, M. E., R. P. Tracy, P. B. Tracy, D. S. Boskovic, and K. G. Mann, 1992. Mathematical Simulation of Prothrombinase. *Methods Enzymol.* 215:316–328.
36. Olson, S. T., R. Swanson, E. Raub-Segall, T. Bedsted, M. Sadri, M. Petitou, J.-P. Héroult, J.-M. Herbert, and I. Björk, 2004. Accelerating ability of synthetic oligosaccharides on antithrombin inhibition of proteinases of the clotting and fibrinolytic systems Comparison with heparin and low-molecular-weight heparin. *Thrombosis and haemostasis* 92:929–939.
37. Solymoss, S., M. Tucker, and P. Tracy, 1988. Kinetics of inactivation of membrane-bound Factor Va by activated protein C. Protein S modulates Factor Xa protection. *J Biol Chem* 263:14884–90.
38. Jesty, J., T.-C. Wun, and A. Lorenz, 1994. Kinetics of the Inhibition of Factor Xa and the Tissue Factor-Factor VIIa Complex by the Tissue Factor Pathway Inhibitor in the Presence and Absence of Heparin. *Biochemistry* 33:12686–12694. <https://pubs.acs.org/doi/abs/10.1021/bi00208a020>.
39. Maroney, S. A., and A. E. Mast, 2015. New insights into the biology of tissue factor pathway inhibitor. *J Thromb Haemost* 13:S200–S207. <https://onlinelibrary.wiley.com/doi/10.1111/jth.12897>.
40. Jesty, J., T. Wun, and A. Lorenz, 1994. Kinetics of the Inhibition of Factor Xa and the Tissue Factor-Factor VIIa Complex by the Tissue Factor Pathway Inhibitor in the Presence and Absence of Heparin. *Biochemistry* 33:12686–12694.
41. Griffin, J. H., 2001. Control of Coagulation Reactions. In E. Beutler, B. Coller, M. Lichtman, T. Kipps, and U. Seligsohn, editors, Williams Hematology, McGraw Hill, New York, 1435–1447.

42. Olson, S., I. Björk, R. Sheffer, P. Craig, J. Shore, and J. Choay, 1992. Role of the antithrombin-binding pentasaccharide in heparin acceleration of antithrombin-proteinase reactions. Resolution of the antithrombin conformational change contribution to heparin rate enhancement. *Journal of Biological Chemistry* 267:12528–12538. <https://linkinghub.elsevier.com/retrieve/pii/S0021925818423095>.
43. Broze, G., and J. Miletich, 1994. Biochemistry and Physiology of Protein C, Protein S, and Thrombomodulin. In R. W. Colman, J. Hirsh, V. J. Marder, and E. W. Salzman, editors, *Hemostasis and Thrombosis: Basic Principles and Clinical Practice*, Lippincott Company, Philadelphia, 259–276.
44. Turitto, V. T., and H. R. Baumgartner, 1979. Platelet Interaction with Subendothelium in Flowing Rabbit Blood: Effect of Blood Shear Rate. *Microvasc. Res.* 17:38–54.
45. Turitto, V. T., H. J. Weiss, and H. R. Baumgartner, 1980. The Effect of Shear Rate on Platelet Interaction with Subendothelium Exposed to Citrated Human Blood. *Microvasc. Res.* 19:352–365.
46. Kuharsky, A., and A. Fogelson, 2001. Surface-mediated Control of Blood Coagulation: The Role of Binding Site Densities and Platelet Deposition. *Biophys J* 80:1050–1074.
47. Gear, A. R. L., 1994. Platelet adhesion, shape change, and aggregation: rapid initiation and signal transduction events. *Can. J. Physiol. Pharmacol.* 72:285–94.
48. Byun, J.-H., I.-S. Jang, J. W. Kim, and E.-H. Koh, 2016. Establishing the heparin therapeutic range using aPTT and anti-Xa measurements for monitoring unfractionated heparin therapy. *Blood Research* 51:171. <https://synapse.koreamed.org/DOIx.php?id=10.5045/br.2016.51.3.171>.
49. Bangham, D., and M. V. Mussett, 1959. The Second International Standard for Heparin. *Bulletin of the World Health Organization* 20:1201.
50. Linhardt, R. J., 2016. Heparin and anticoagulation. *Frontiers in Bioscience* 21:1372–1392. <https://imrpress.com/journal/FBL/21/7/10.2741/4462>.
51. Hirsh, J., and M. Levine, 1992. Low molecular weight heparin. *Blood* 79:1–17. <https://ashpublications.org/blood/article/79/1/1/173040/Low-molecular-weight-heparin>.
52. Link, K. G., M. T. Stobb, J. Di Paola, K. B. Neeves, A. L. Fogelson, S. S. Sindi, and K. Leiderman, 2018. A local and global sensitivity analysis of a mathematical model of coagulation and platelet deposition under flow. *PLoS ONE* 13:e0200917. <https://dx.plos.org/10.1371/journal.pone.0200917>.
